# Supplementary material for: Air Pollutants’ Concentrations Are Associated with Increased Number of RSV Hospitalizations in Polish Children
Source: MDPI journal article supplement (doi:10.3390/jcm10153224), 2021-07-22

Supplementary materials 2. The annual boxplots of air pollutants' (PM<sub>2.5</sub>, PM<sub>10</sub>, NO<sub>2</sub>) concentrations in the studied cities throughout the analysed period (2012-2019). Abbreviations for the cities: GDA- Gdansk, WAW- Warsaw, KRA-Krakow, WRO- Wroclaw, LOD- Lodz, SZC- Szczecin, WAL- Walbrzych

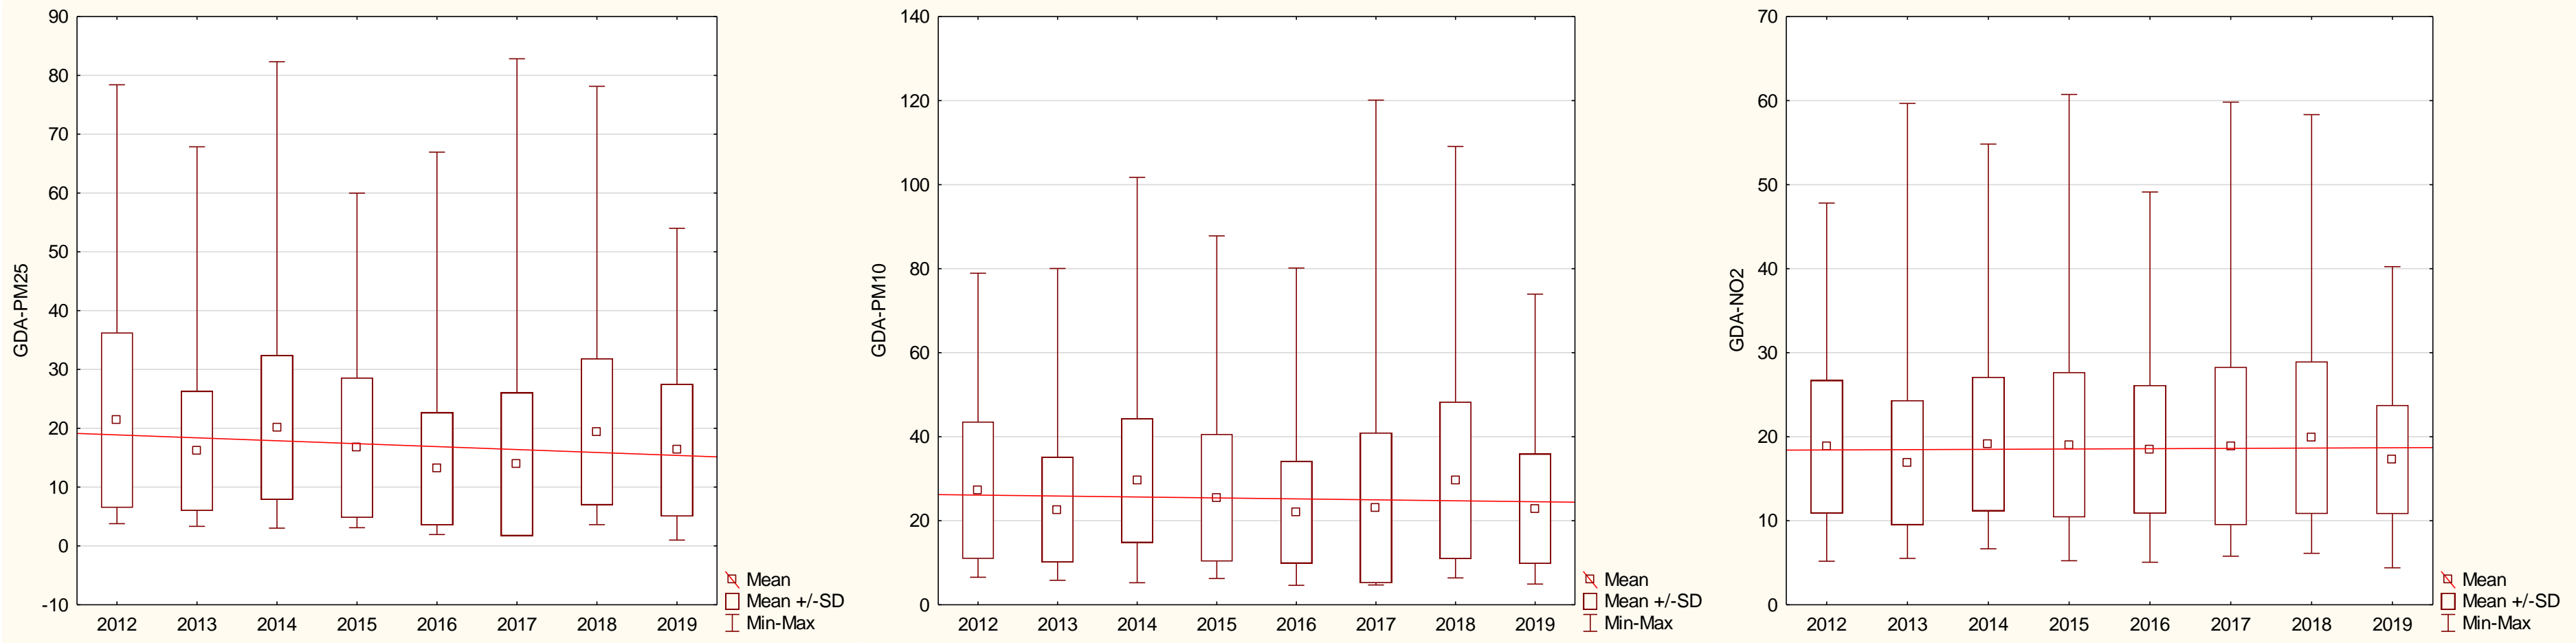

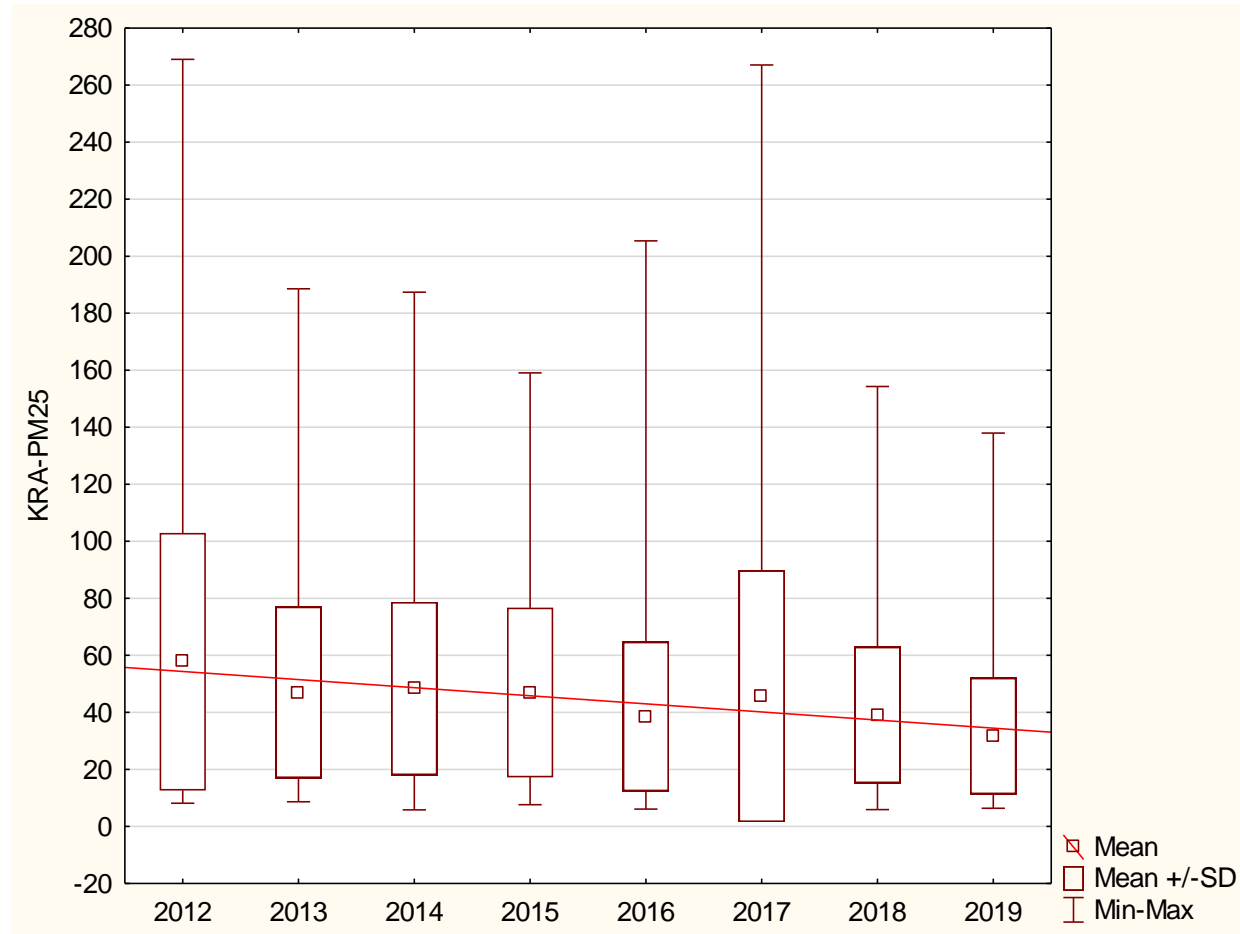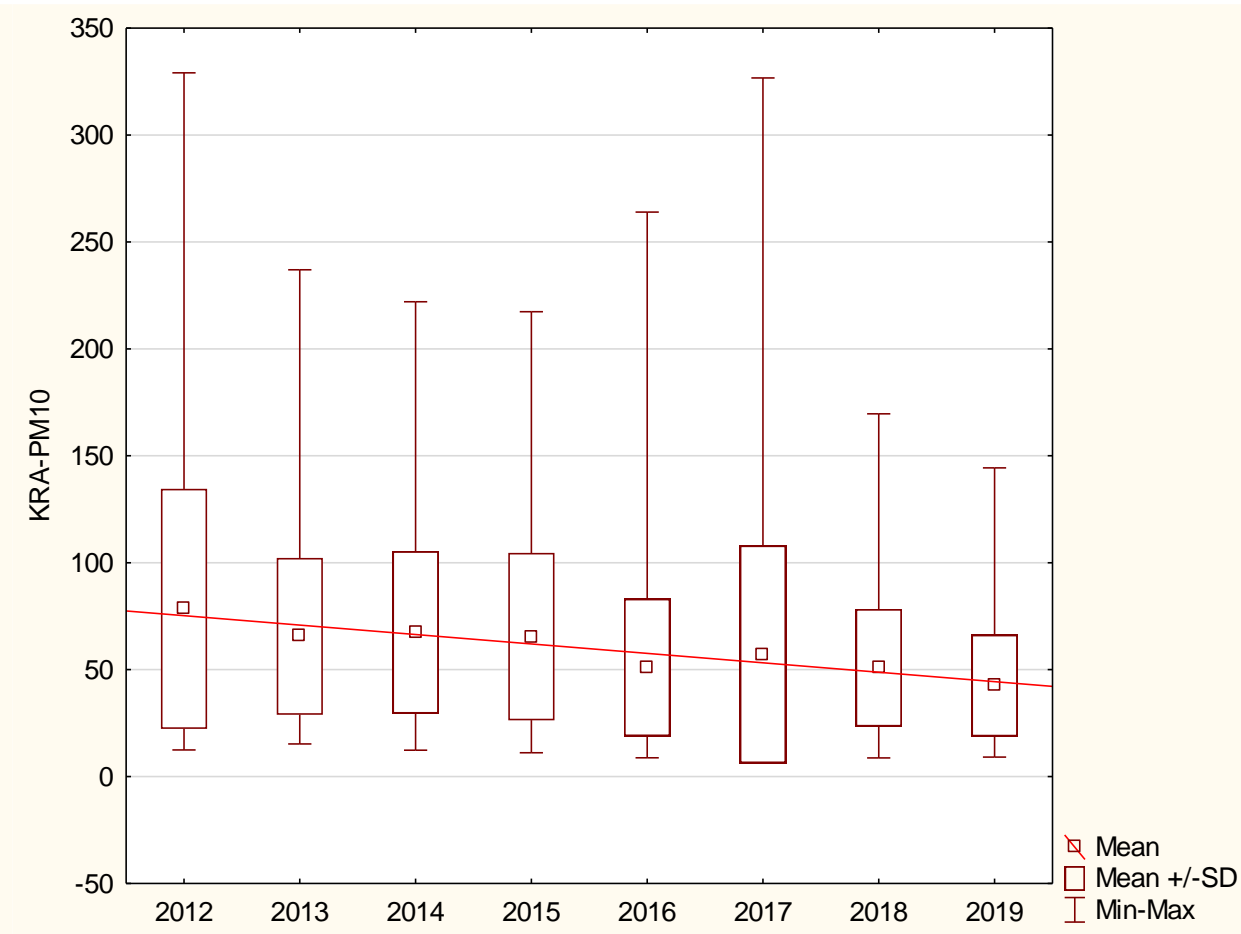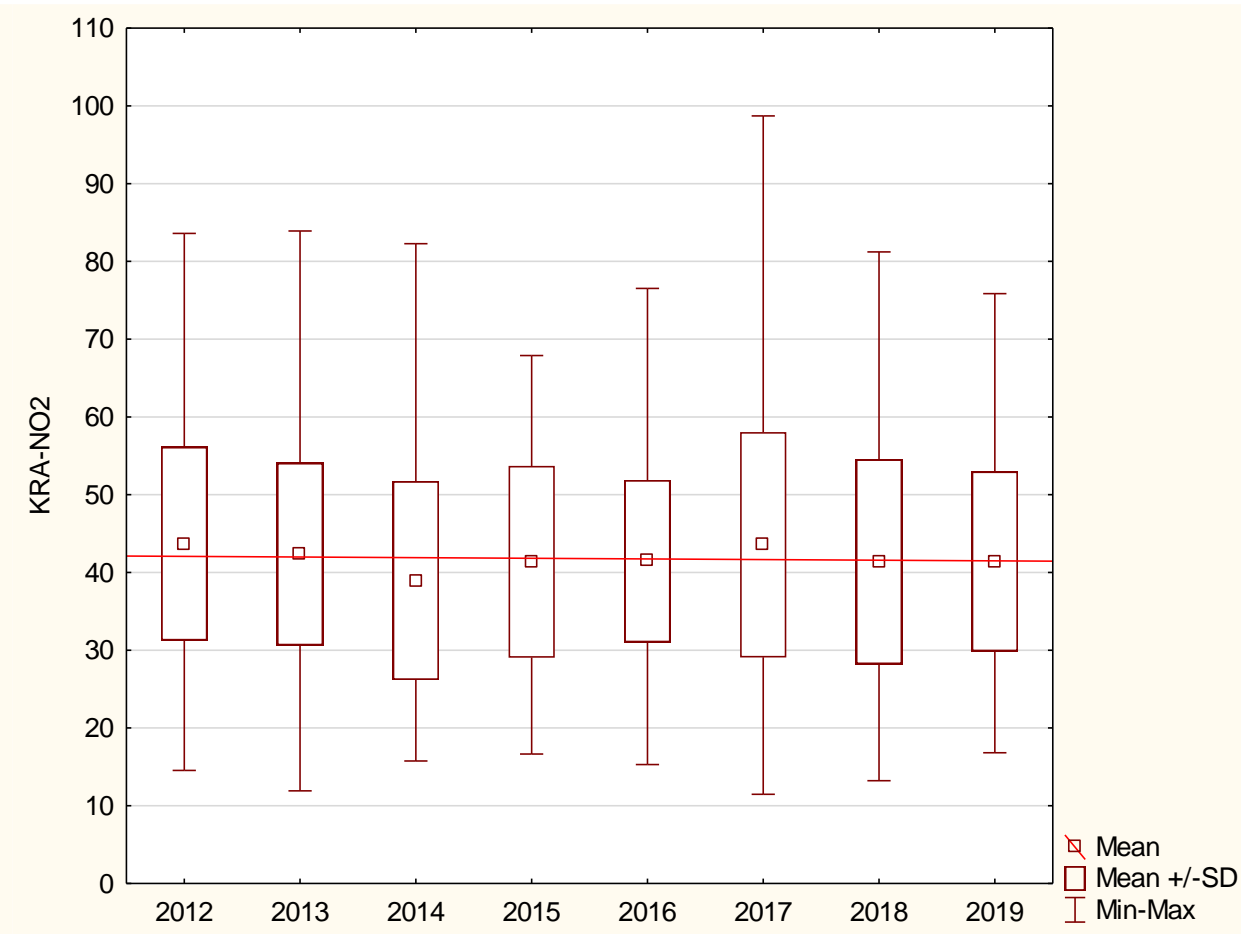

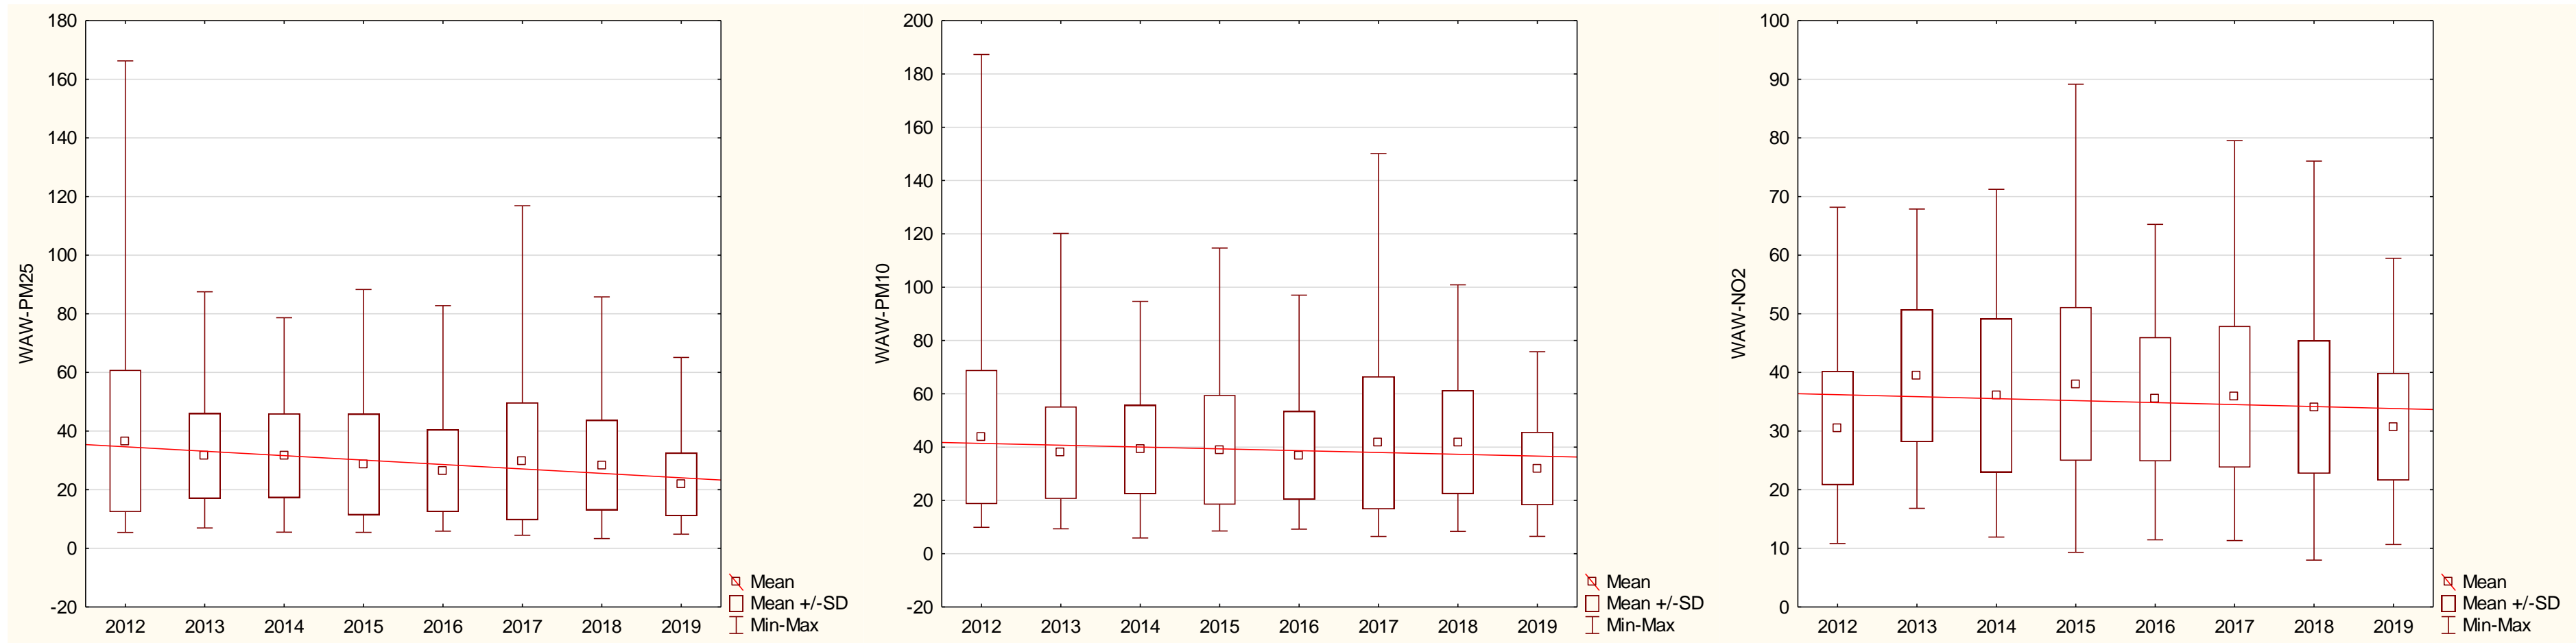

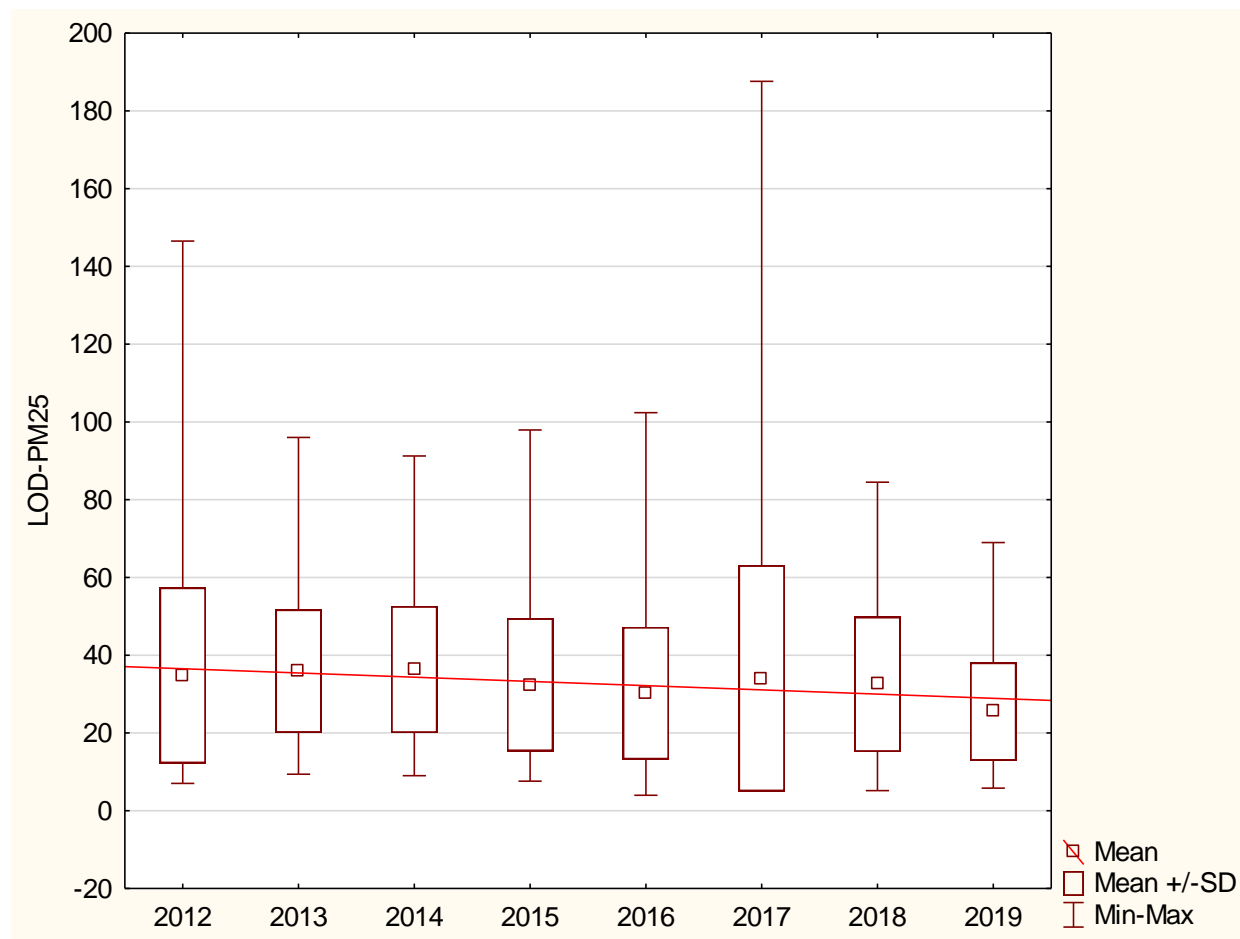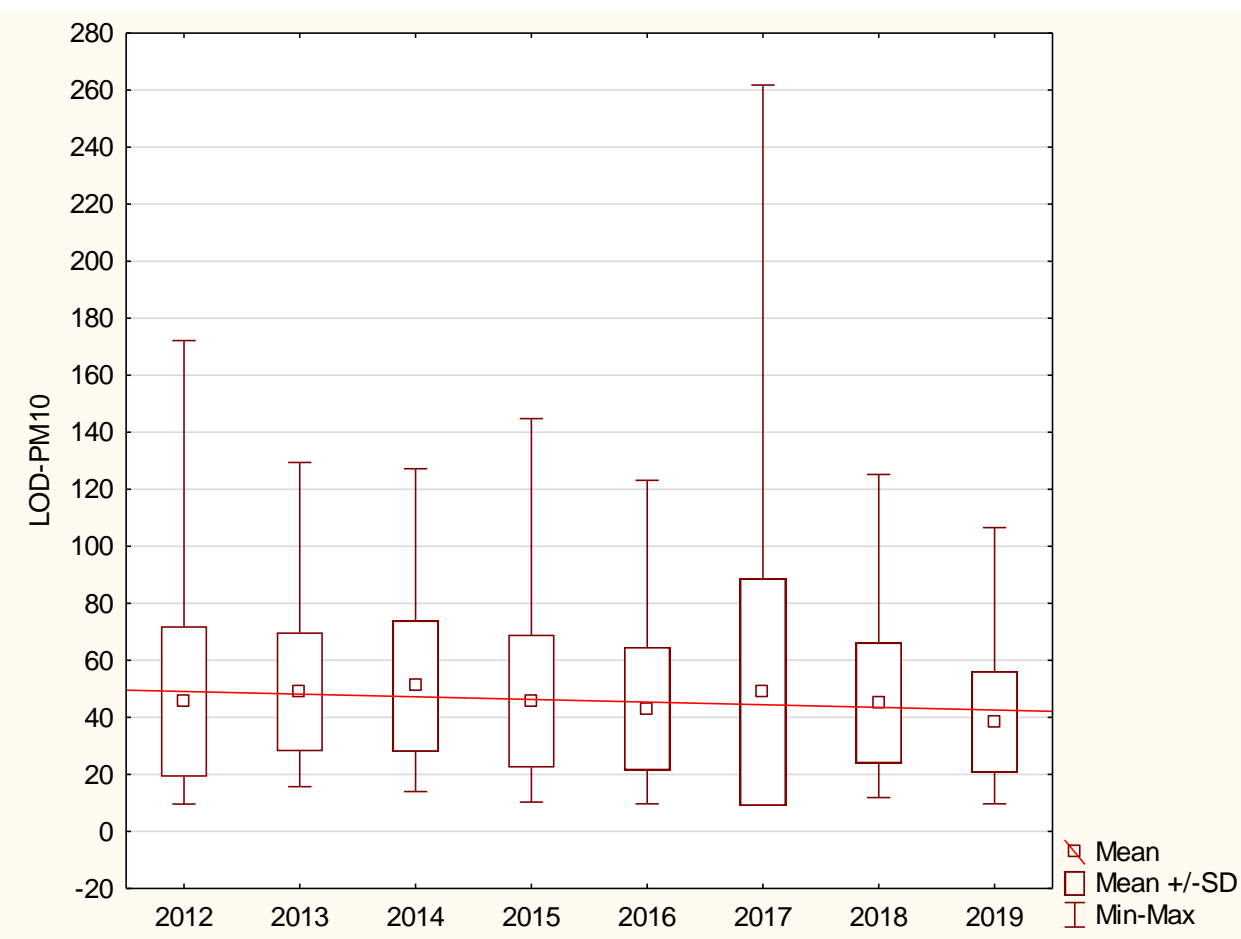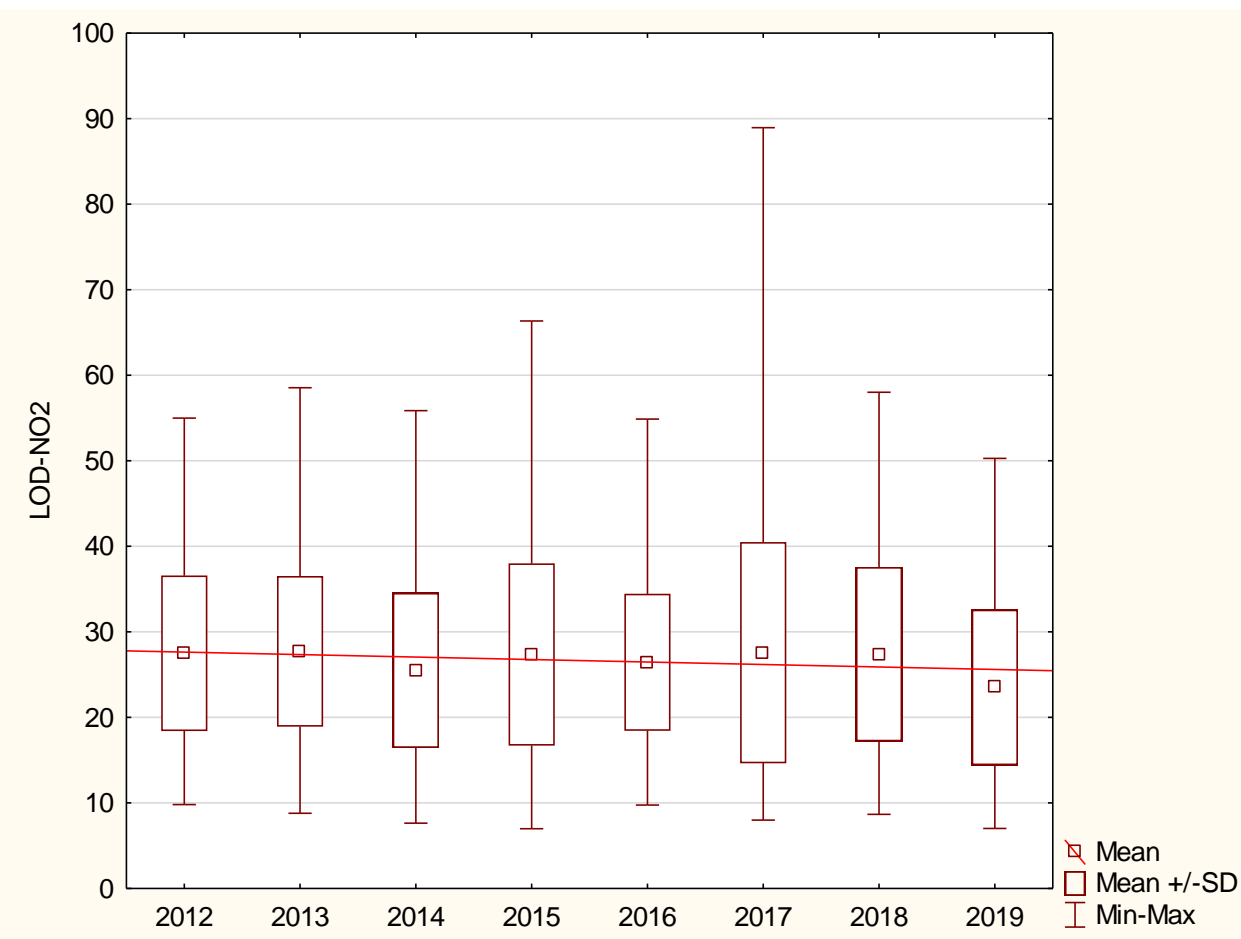

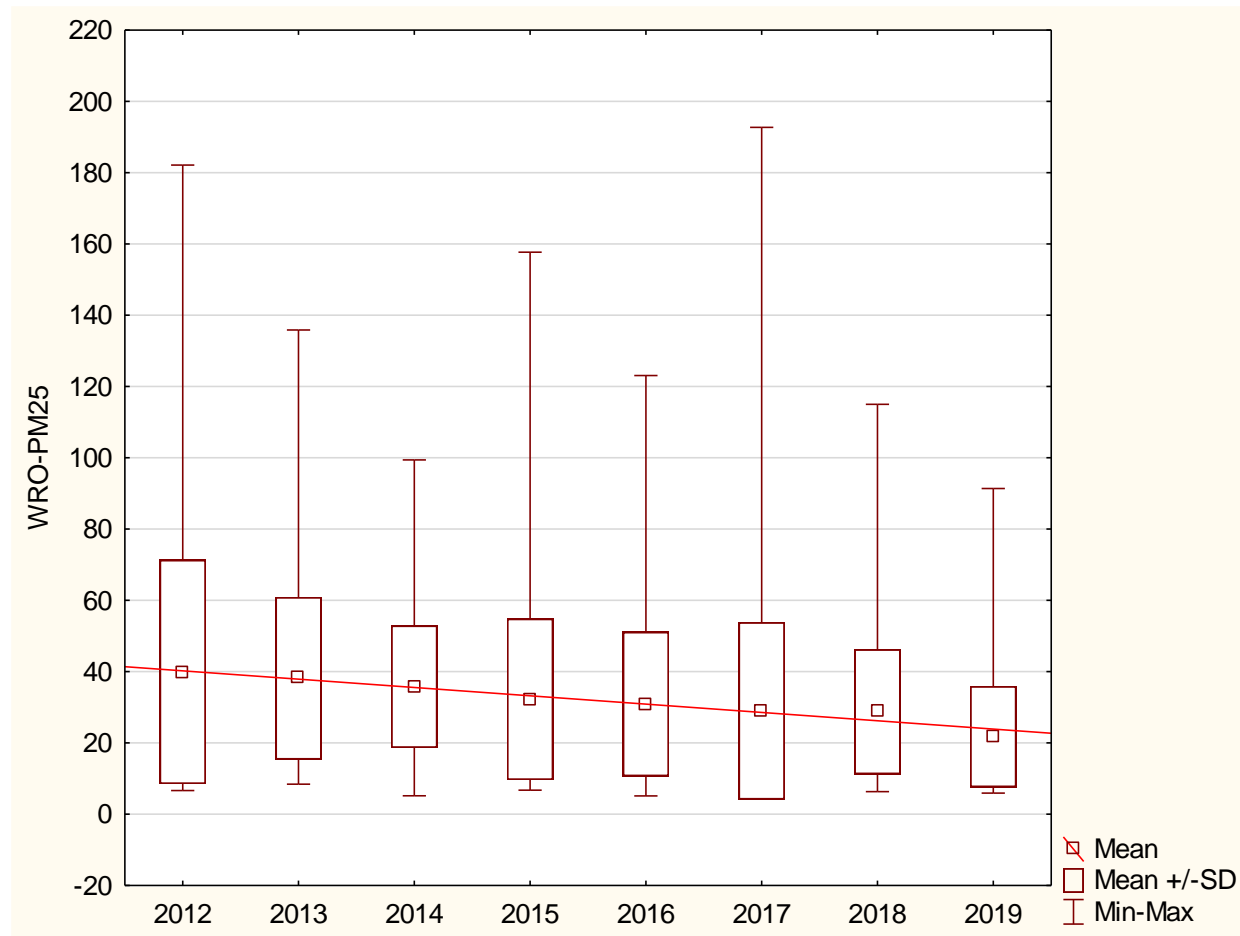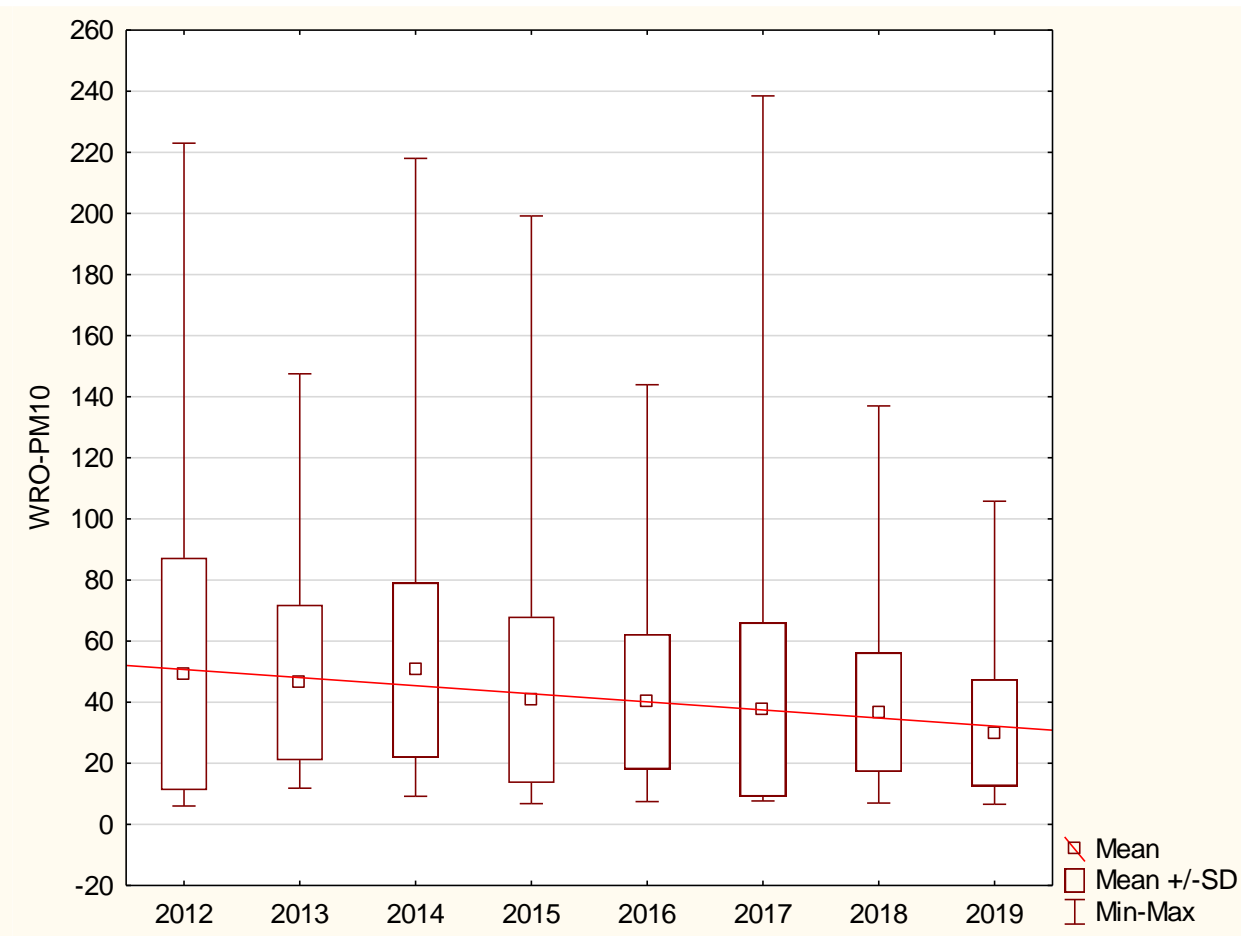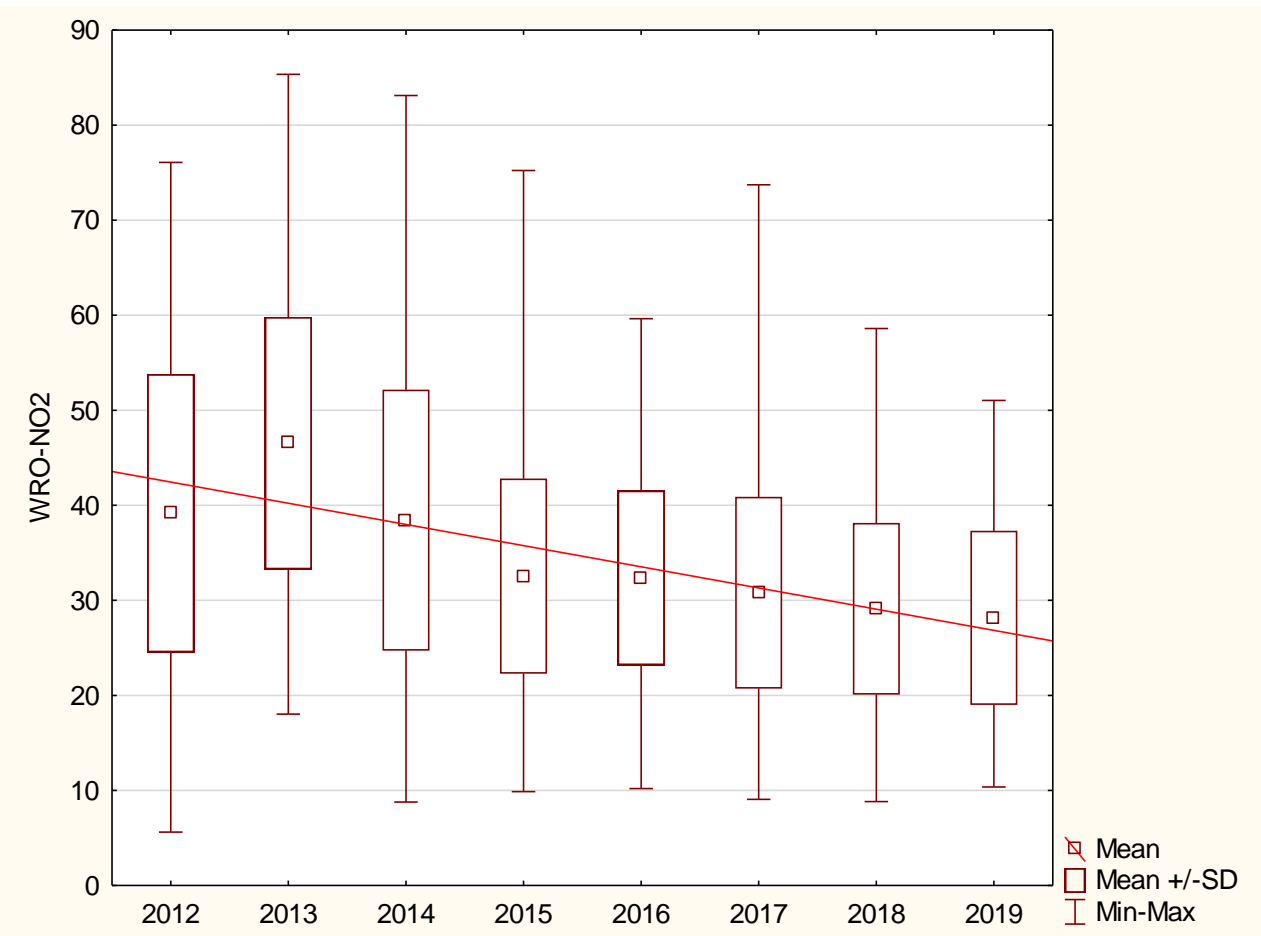

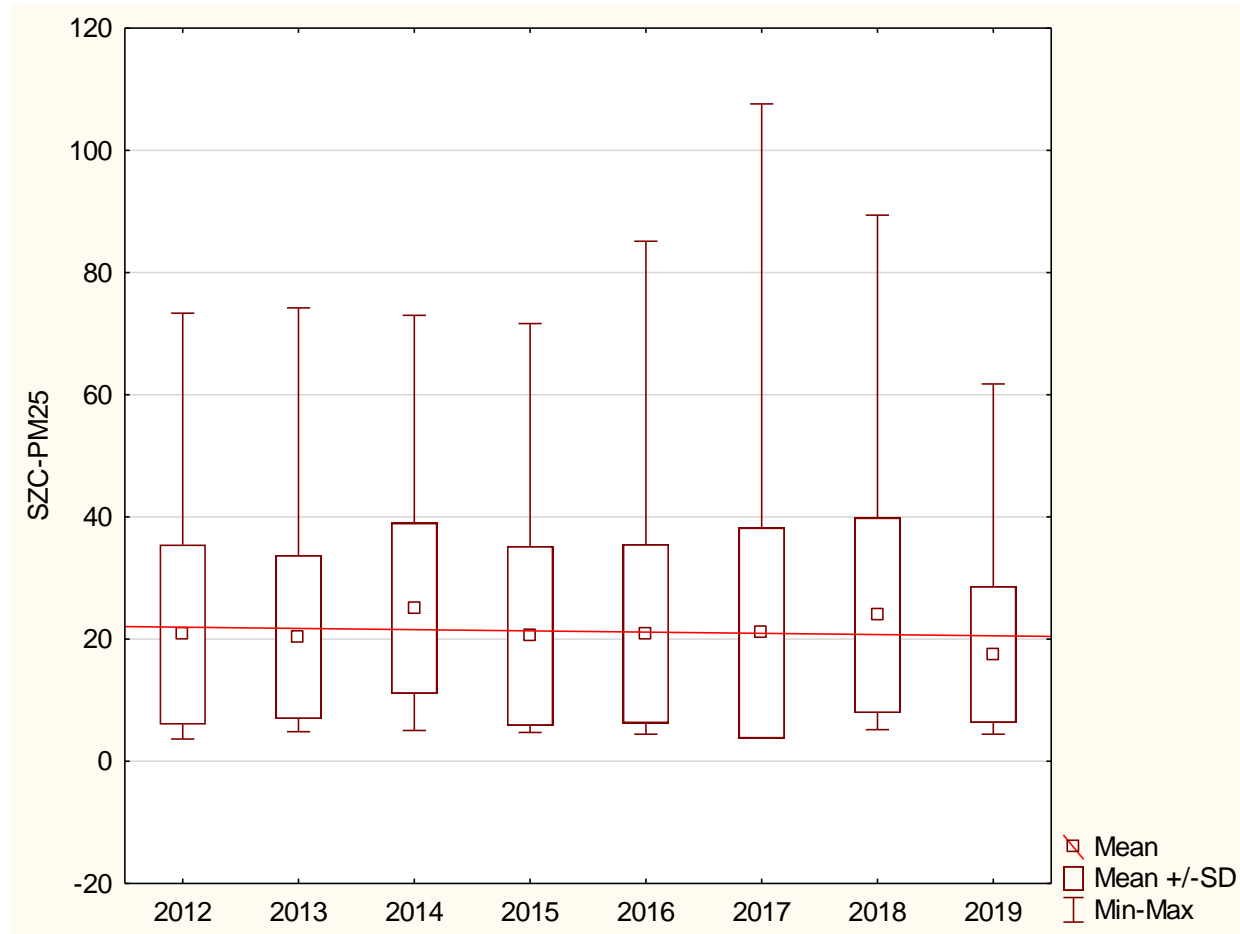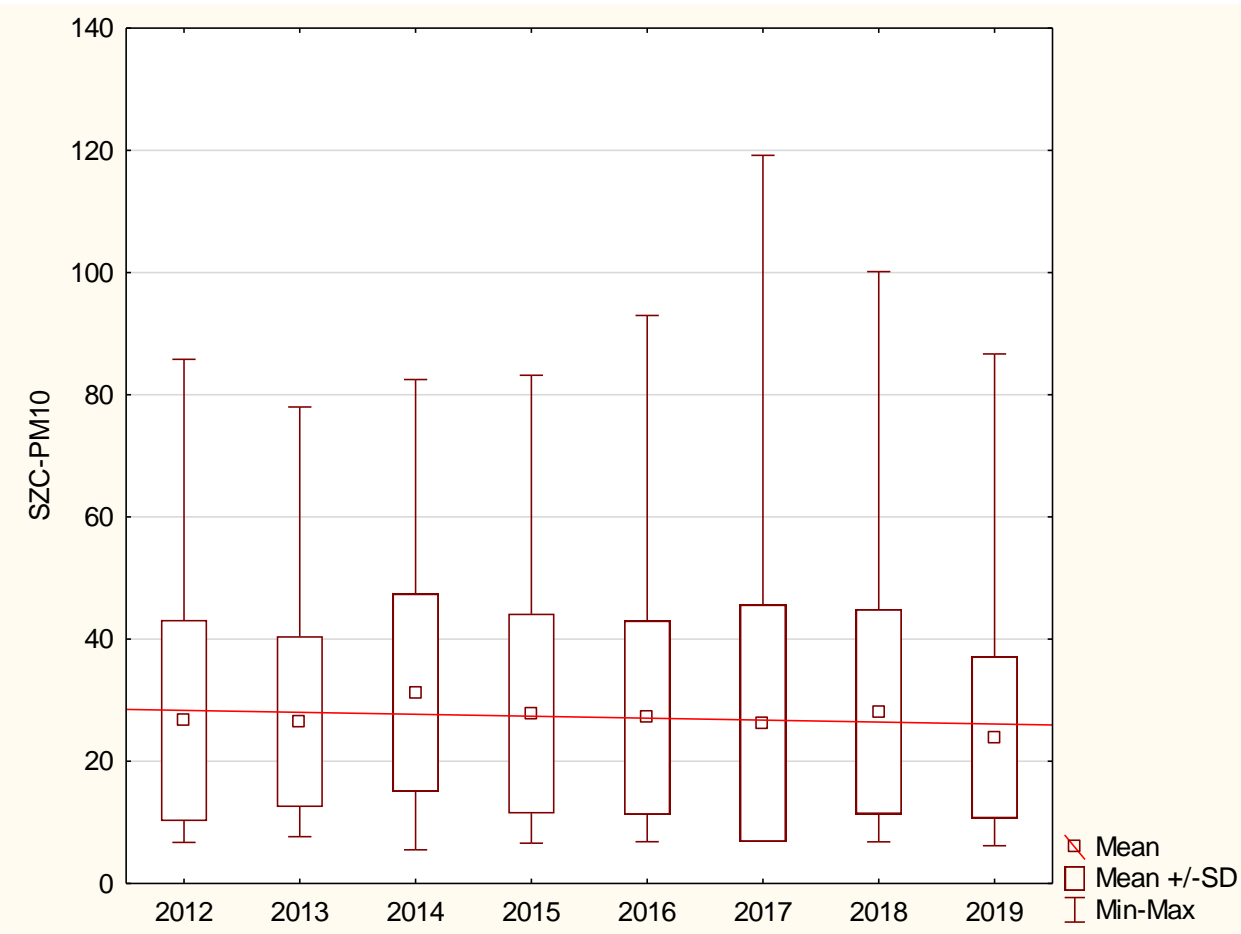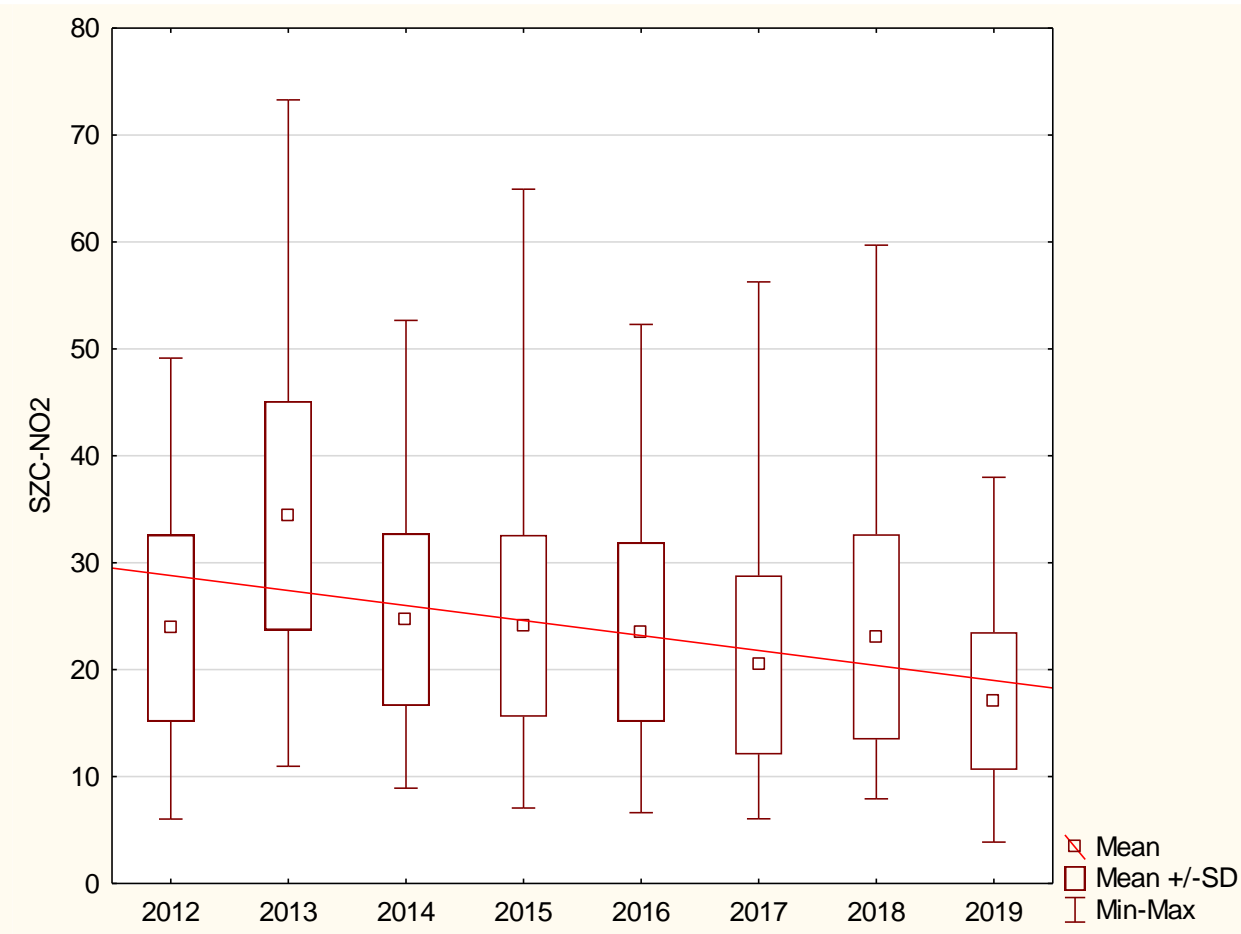

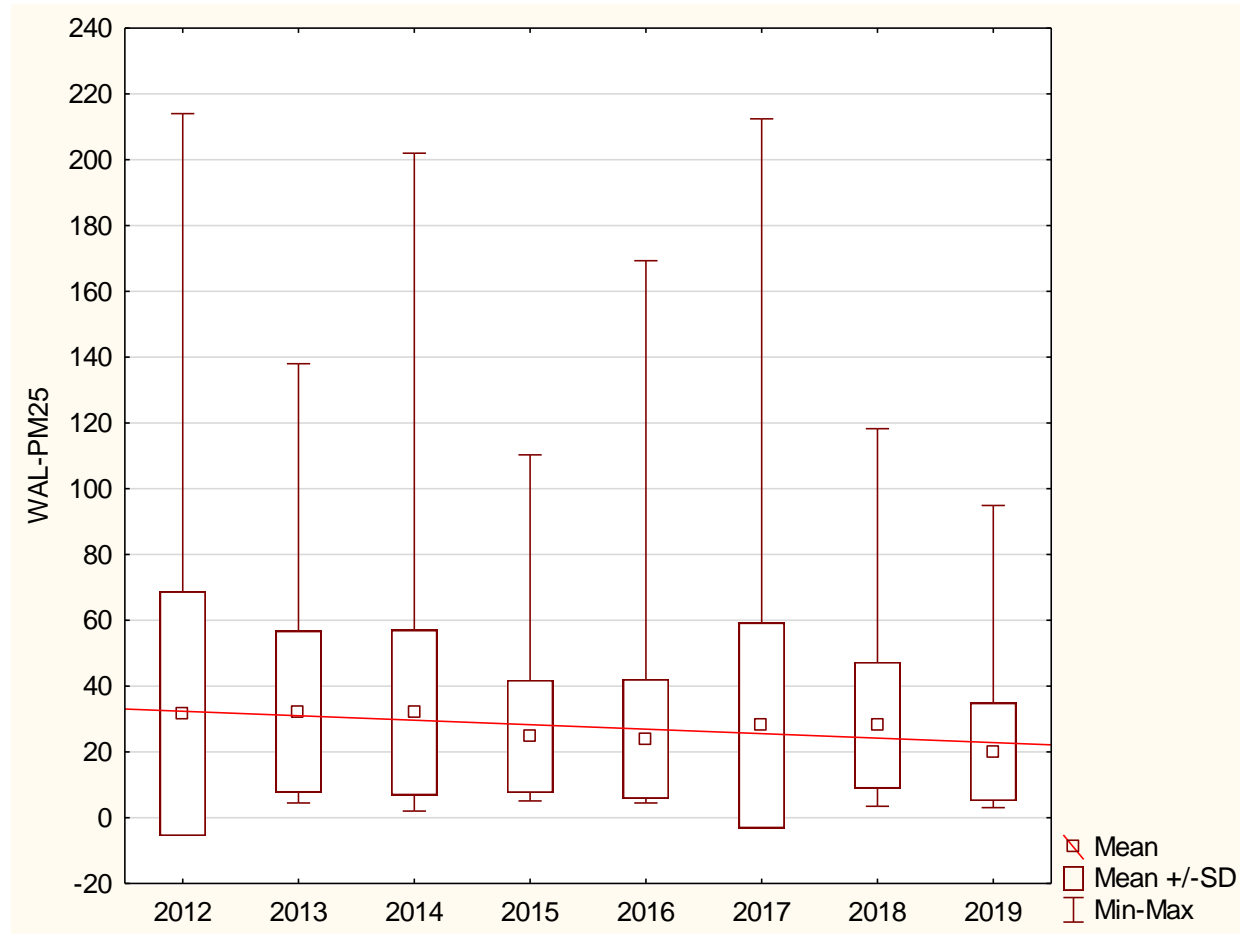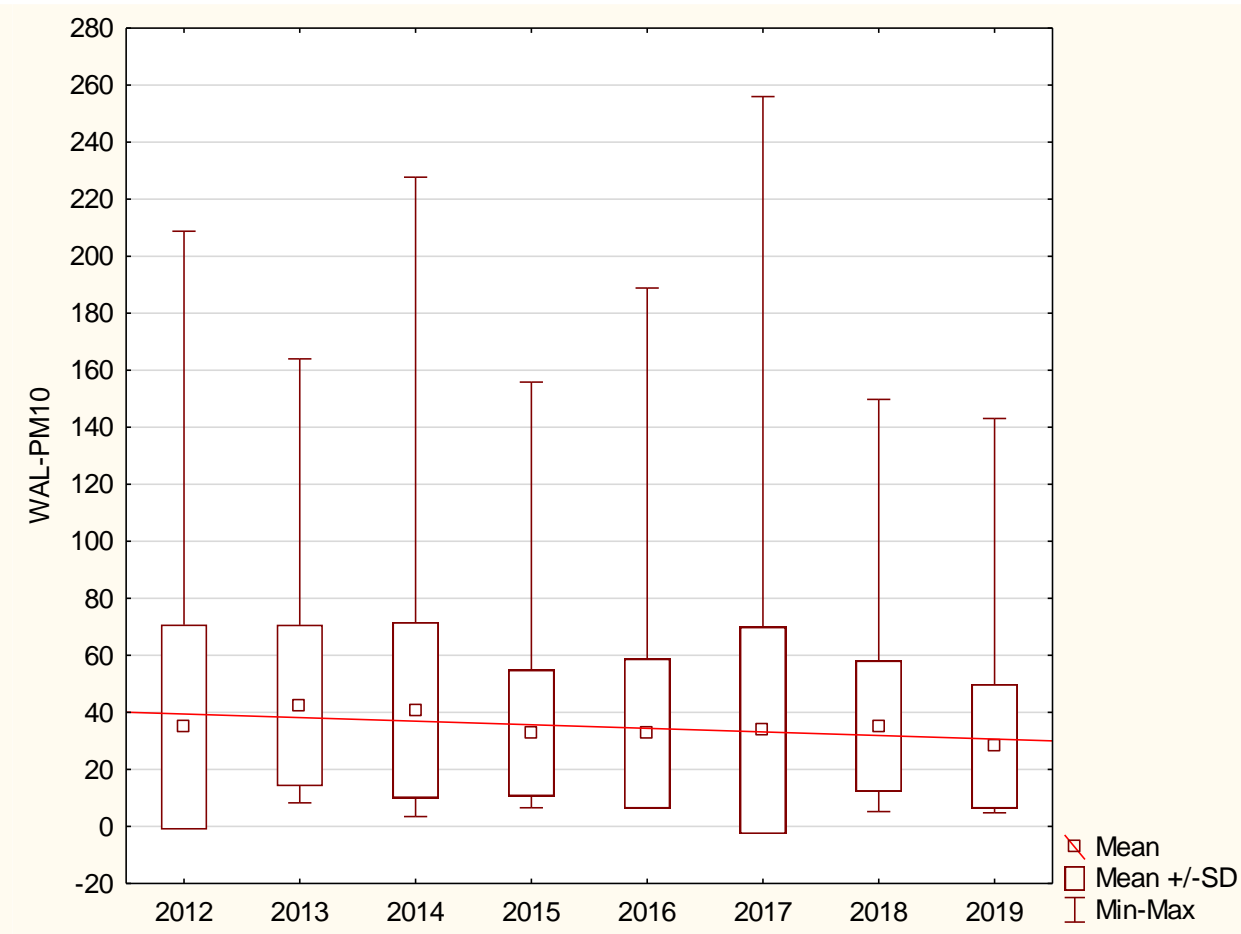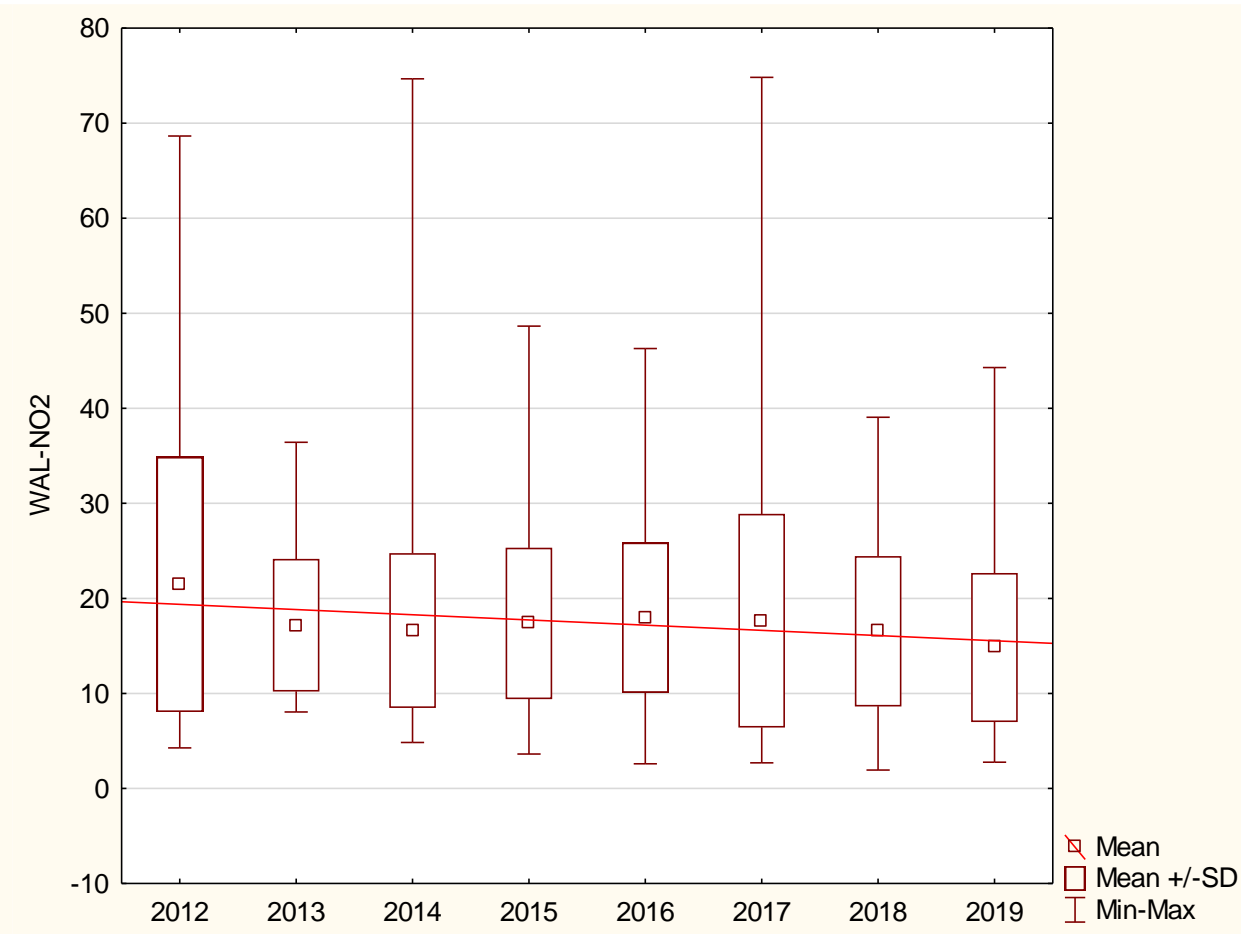

Supplement: s1 [file s1]
