# Supplementary material for: Air Pollutants’ Concentrations Are Associated with Increased Number of RSV Hospitalizations in Polish Children
Source: MDPI journal article supplement (doi:10.3390/jcm10153224), 2021-07-22

### Supplementary materials 3.

The exemplary results of the city to city comparisons of autocorrelation function (ACF) and partial autocorrelation function (PACF) for Warsaw (a- ACF for NO2, b- PACF for NO2, c- ACF for PM2.5, d- PACF for PM2.5, e- ACF for PM10, f- PACF for PM10) and Gdansk (g- ACF for NO2, h- PACF for NO2, i- ACF for PM2.5, j- PACF for PM2.5, k- ACF for PM10, l- PACF for PM10).

a)

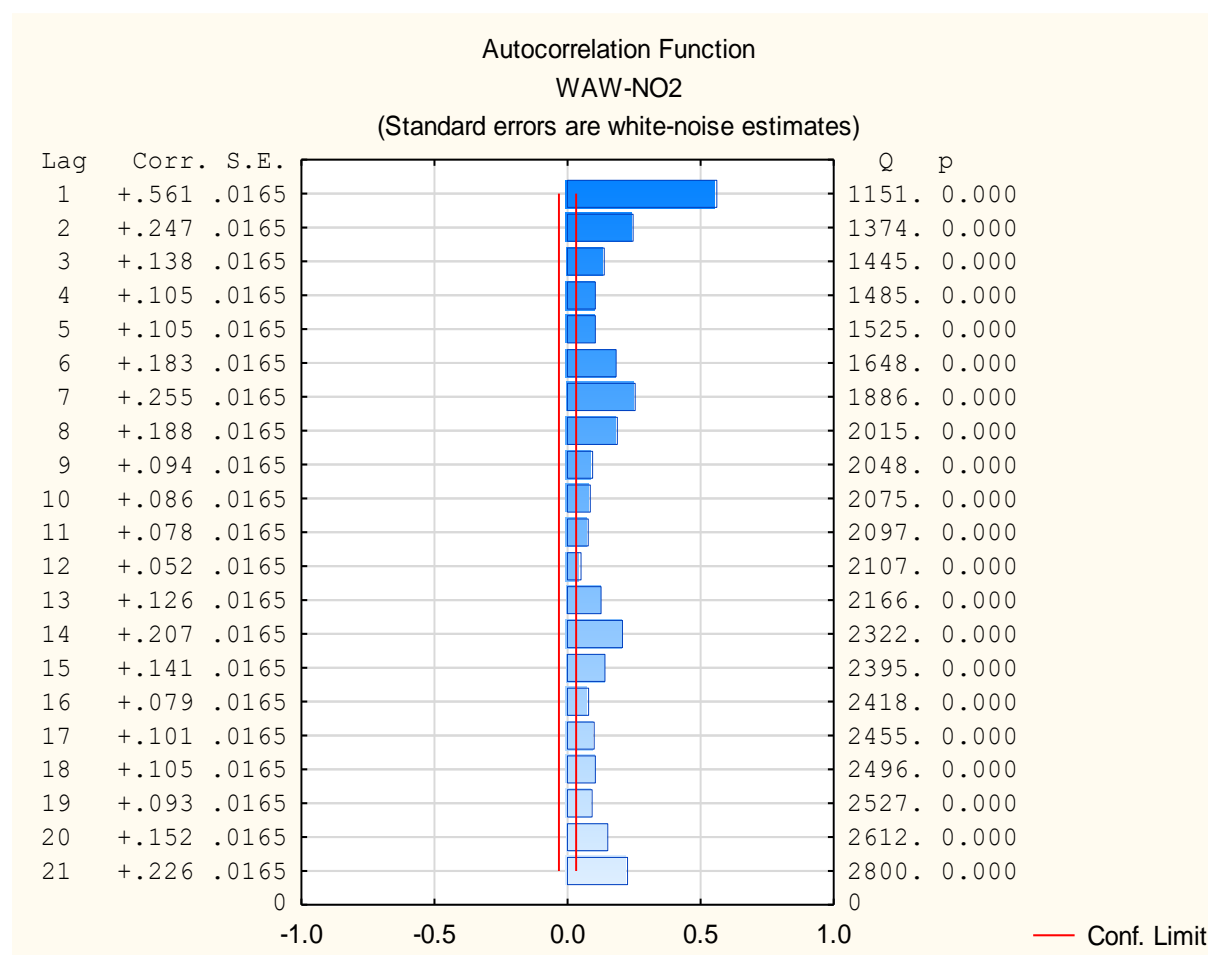

b)

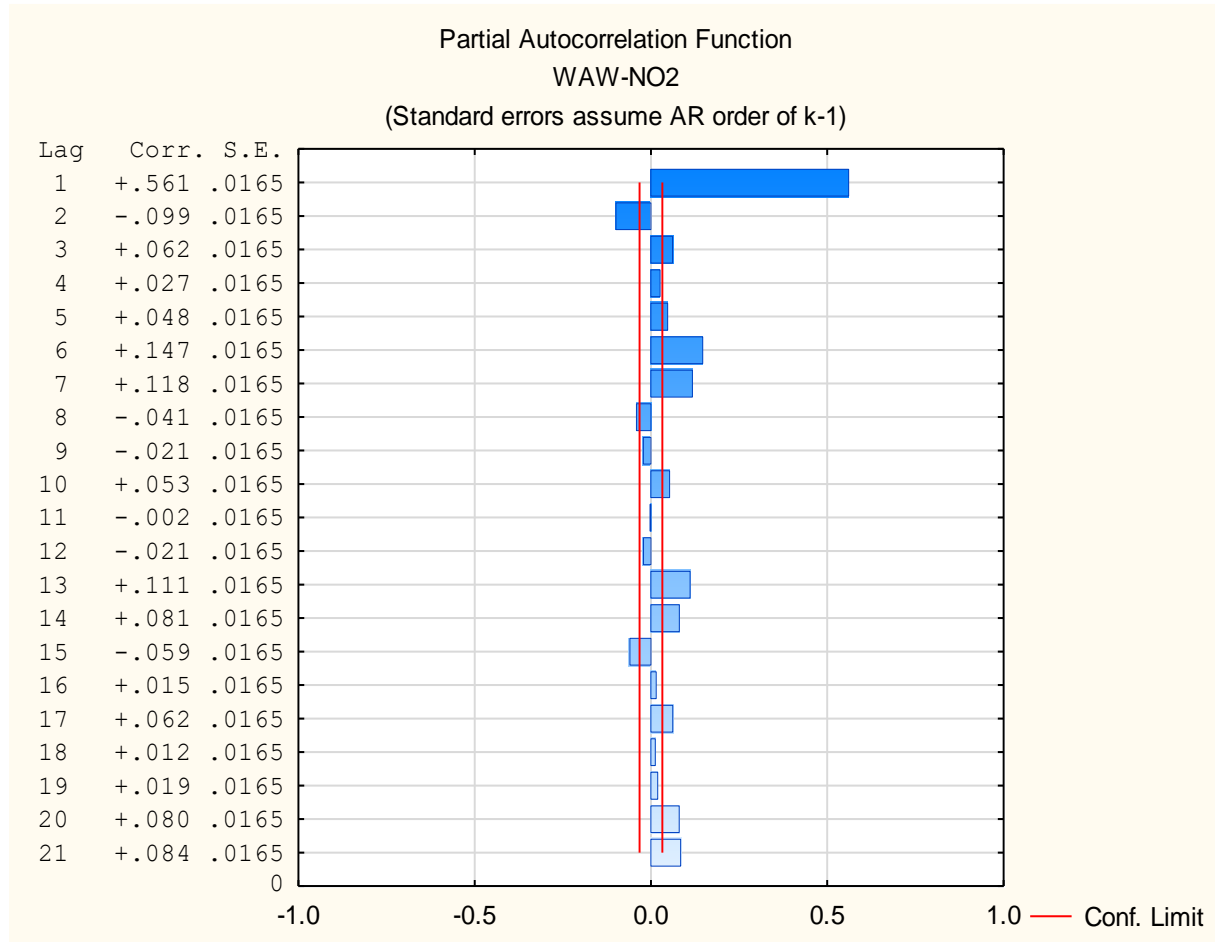

c)

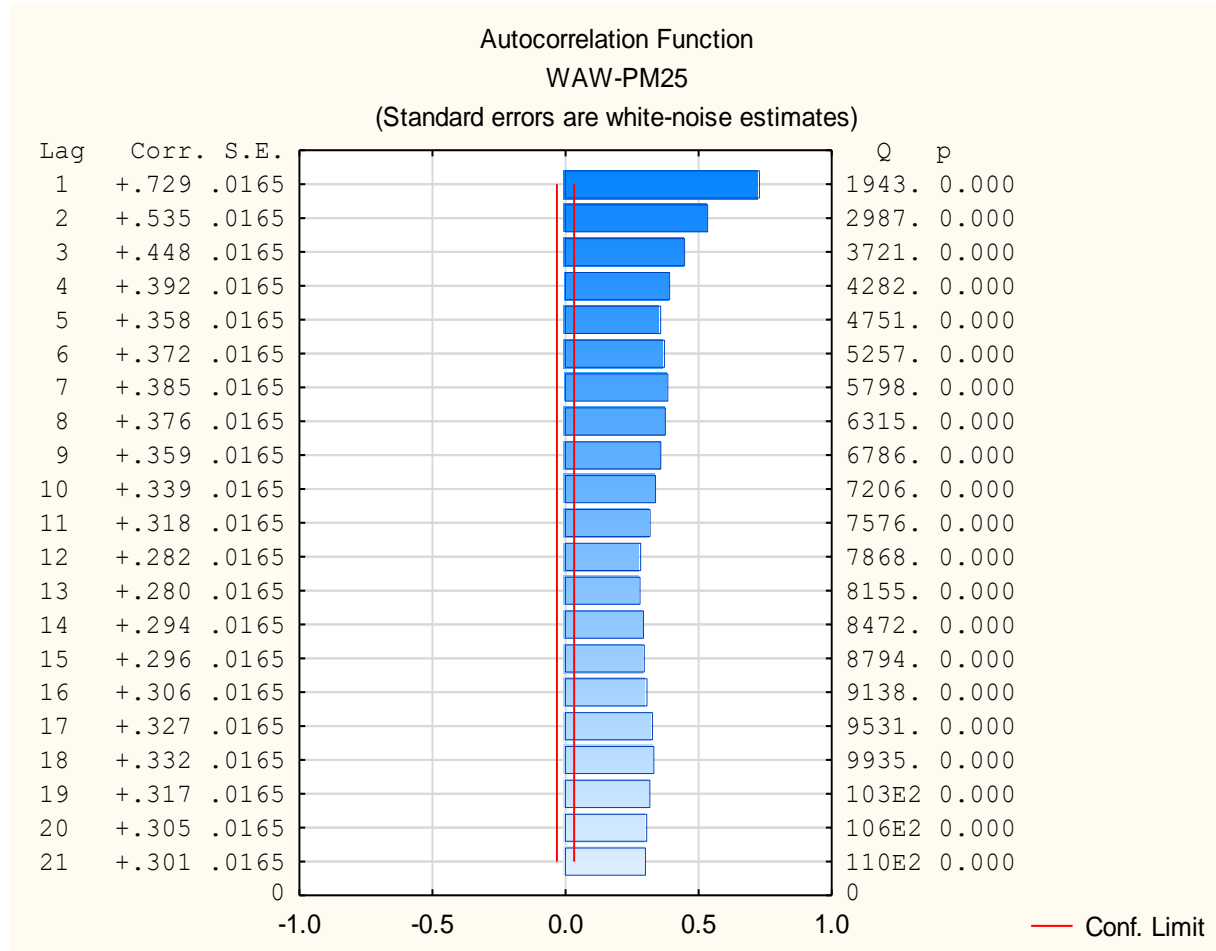

d)

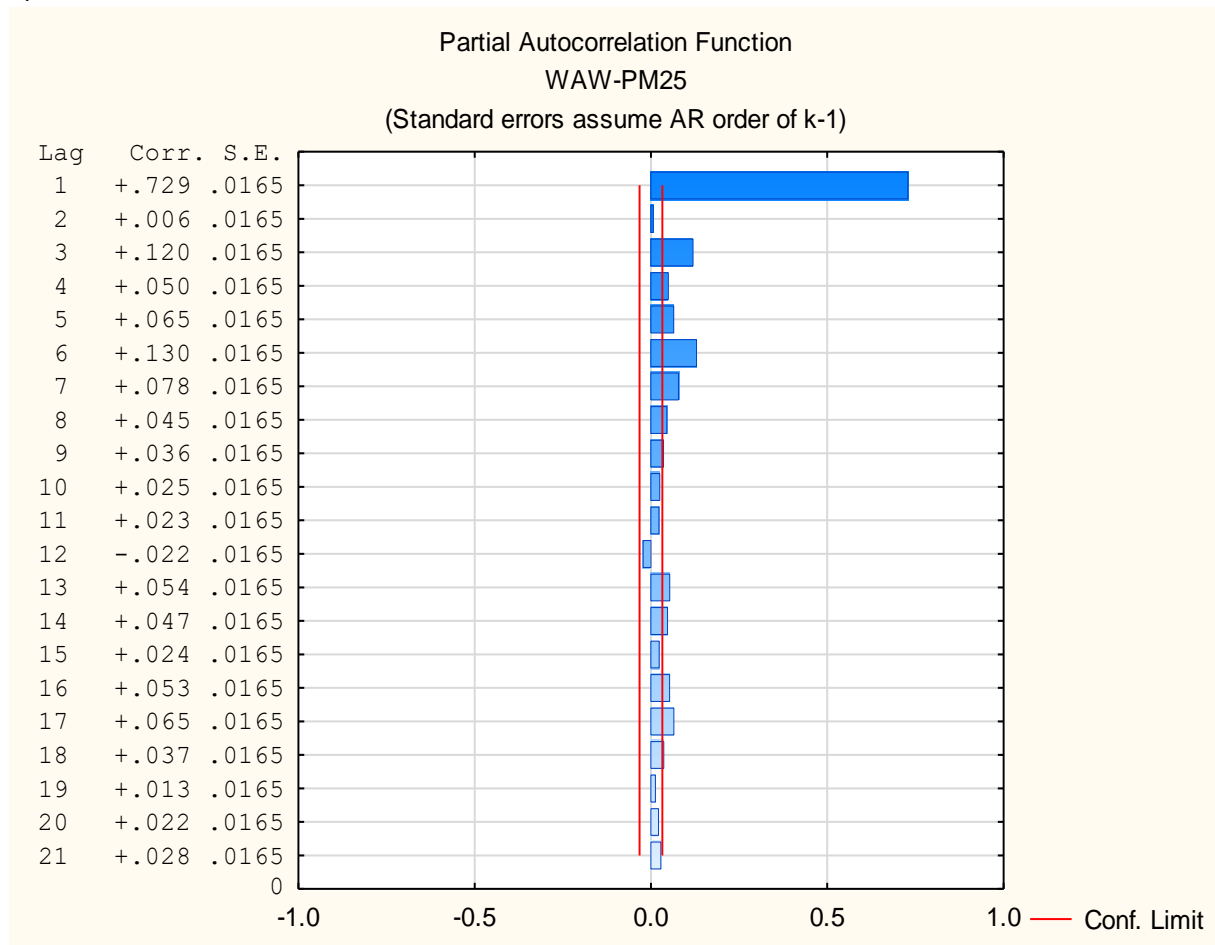

e)

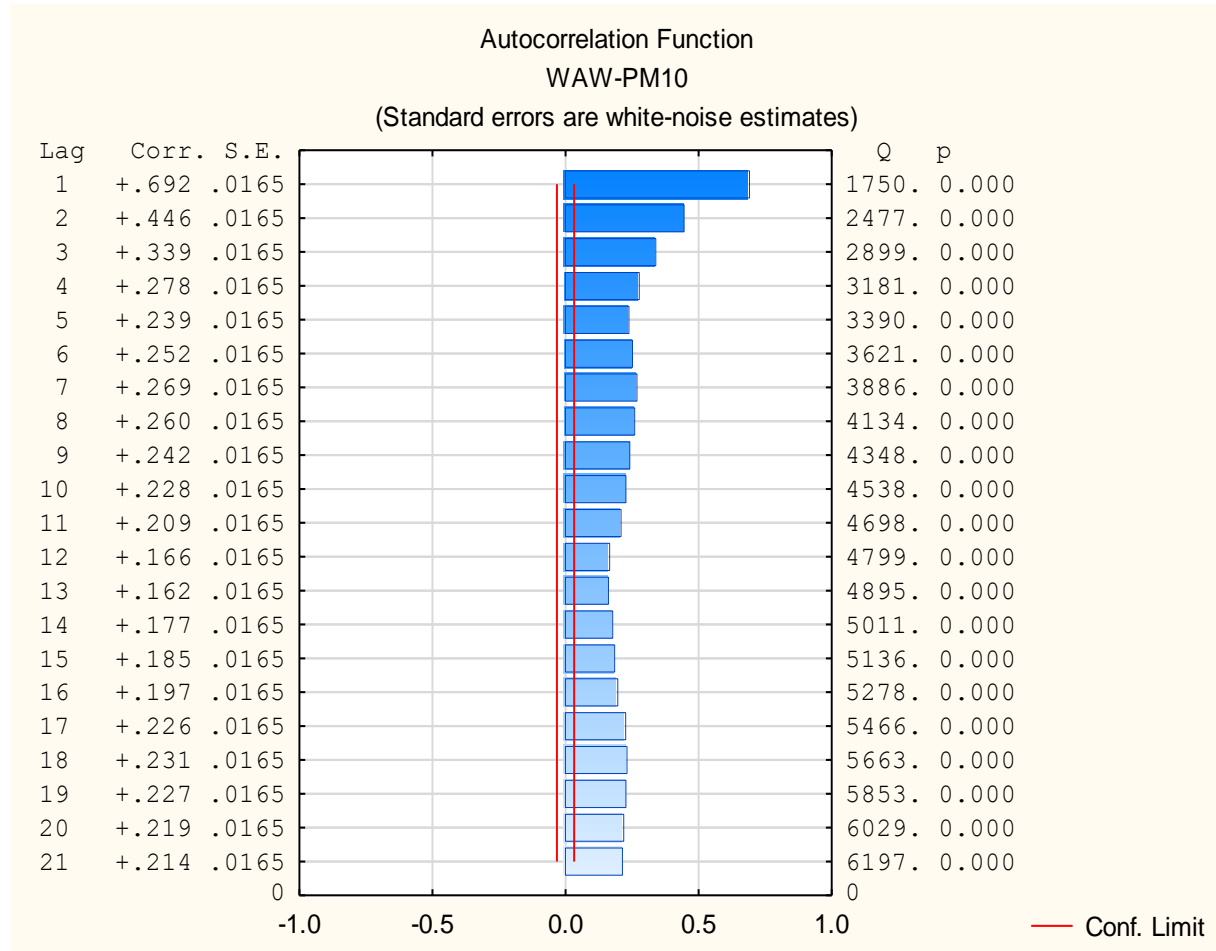

f)

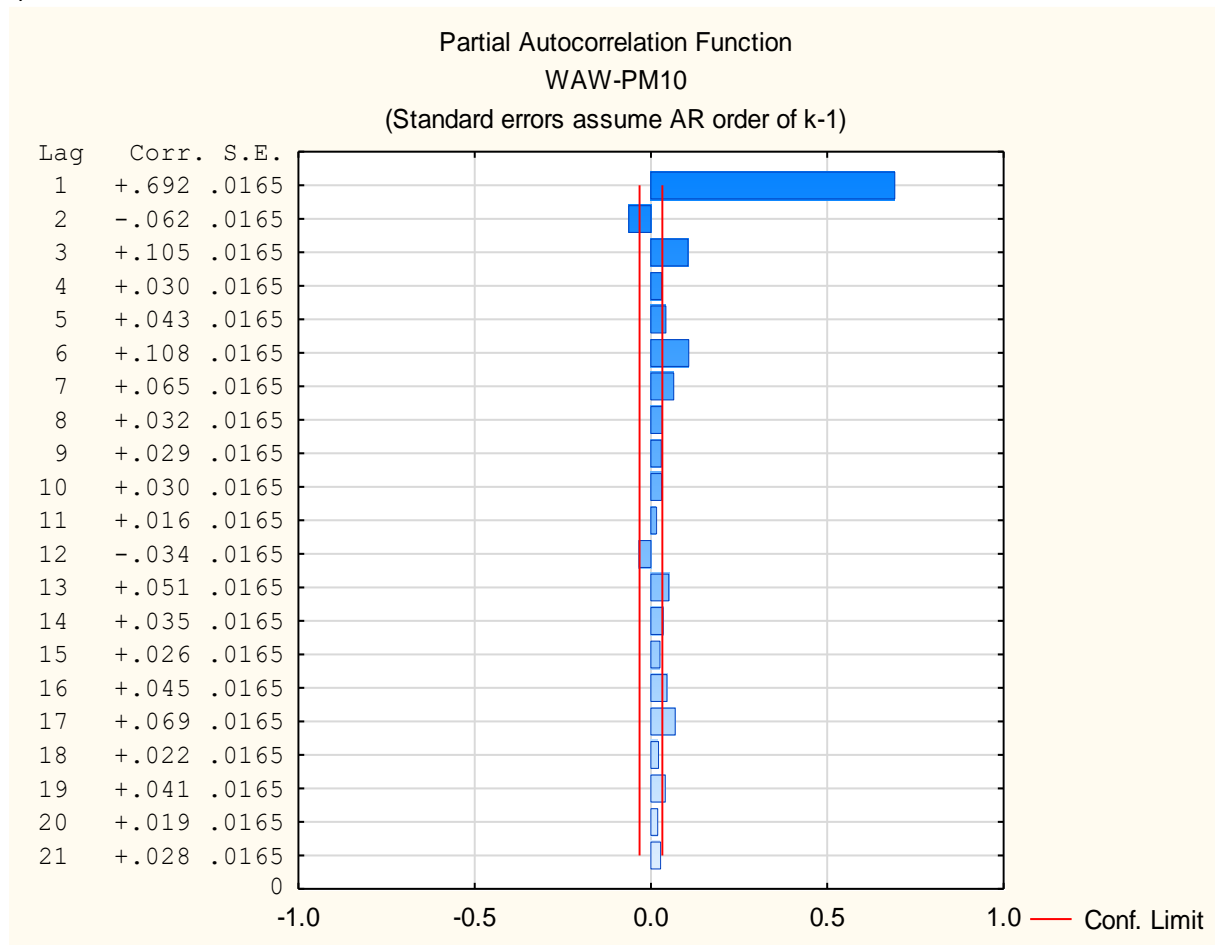

g)

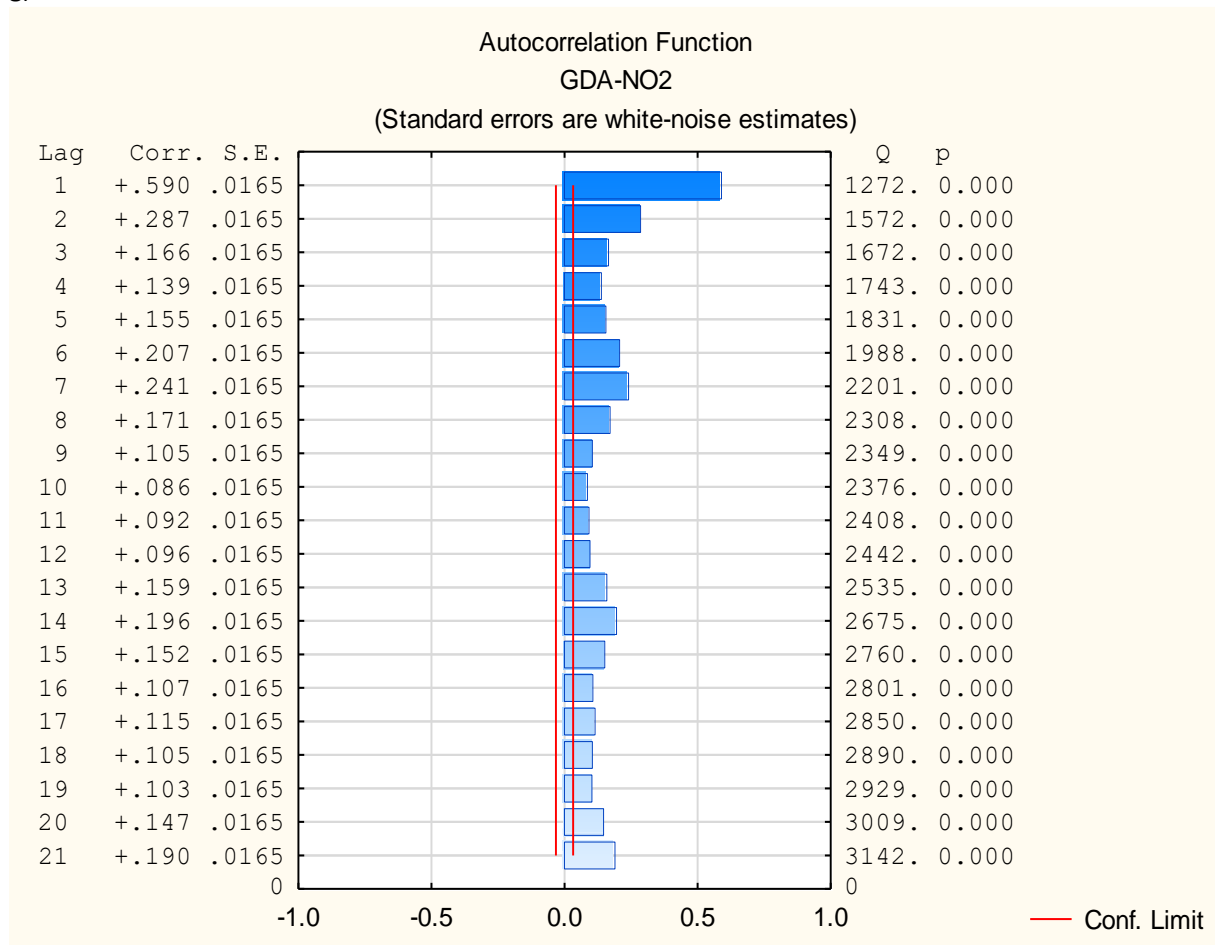

h)

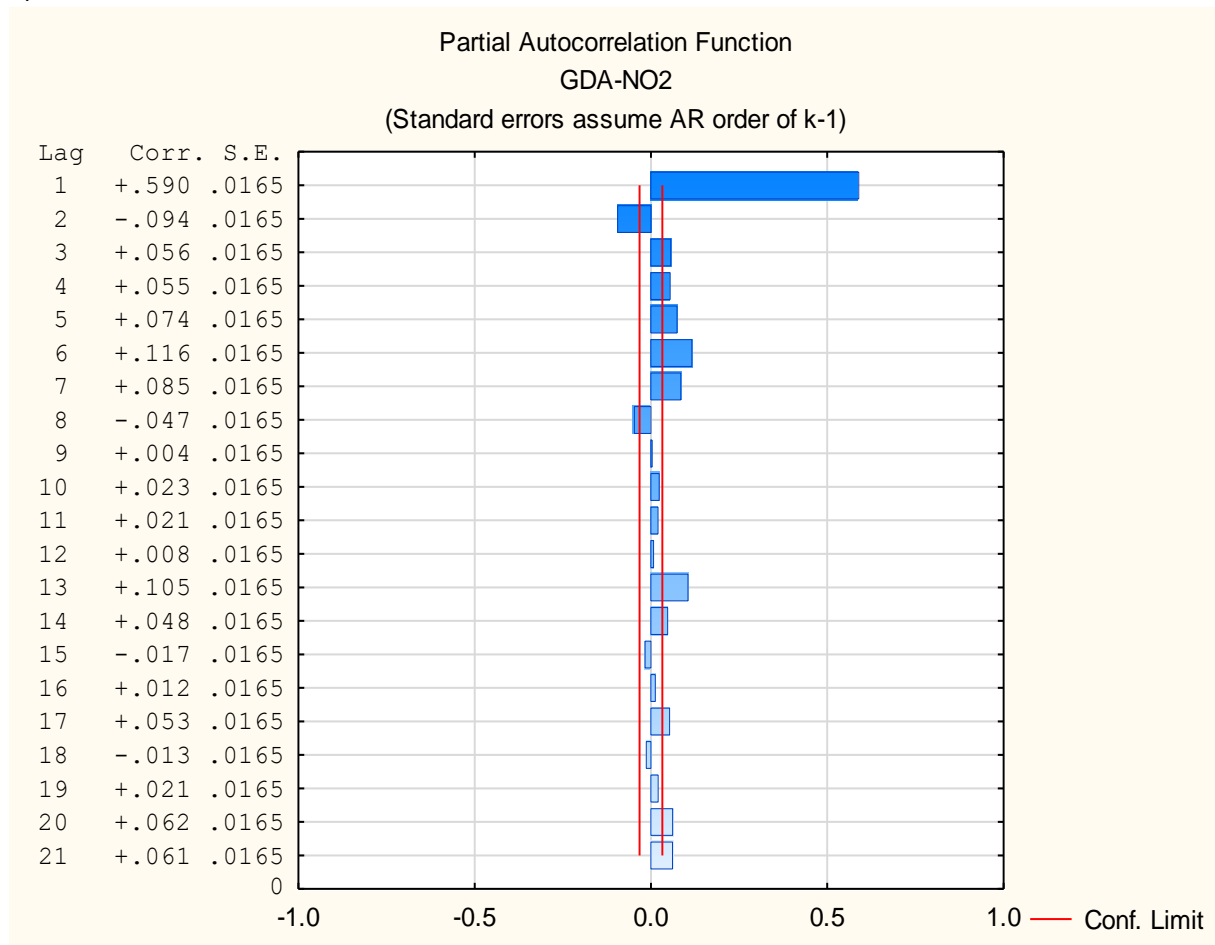



i)

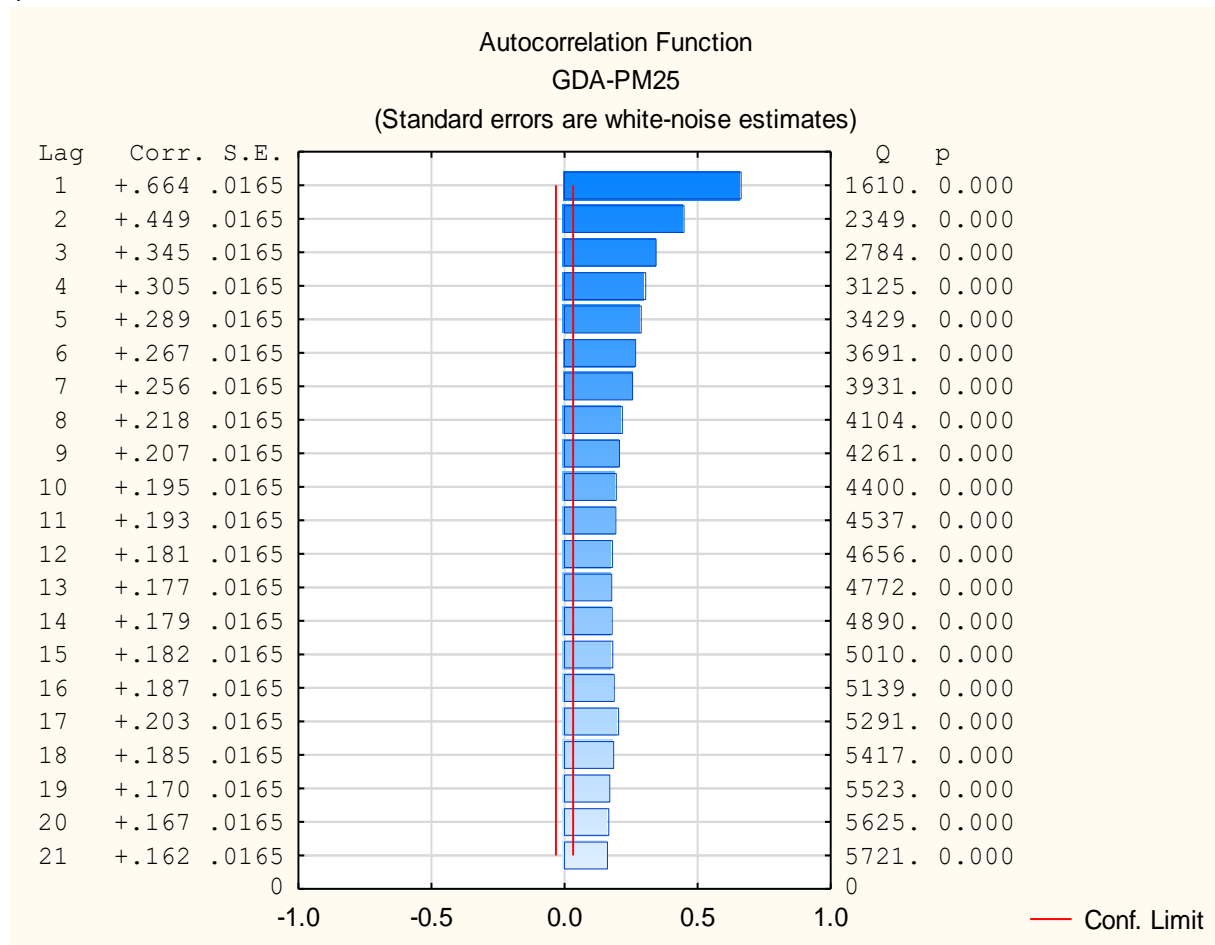

j)

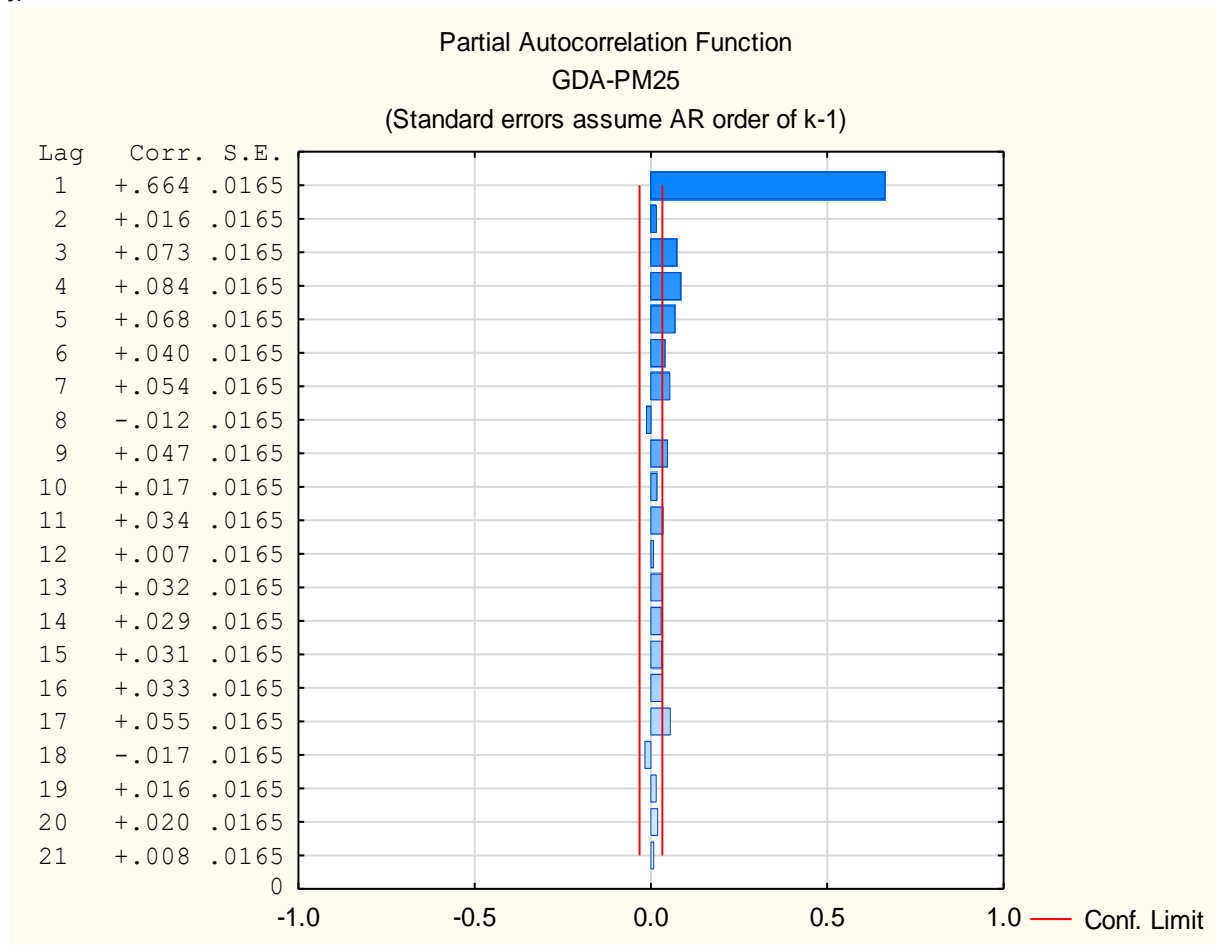

k)

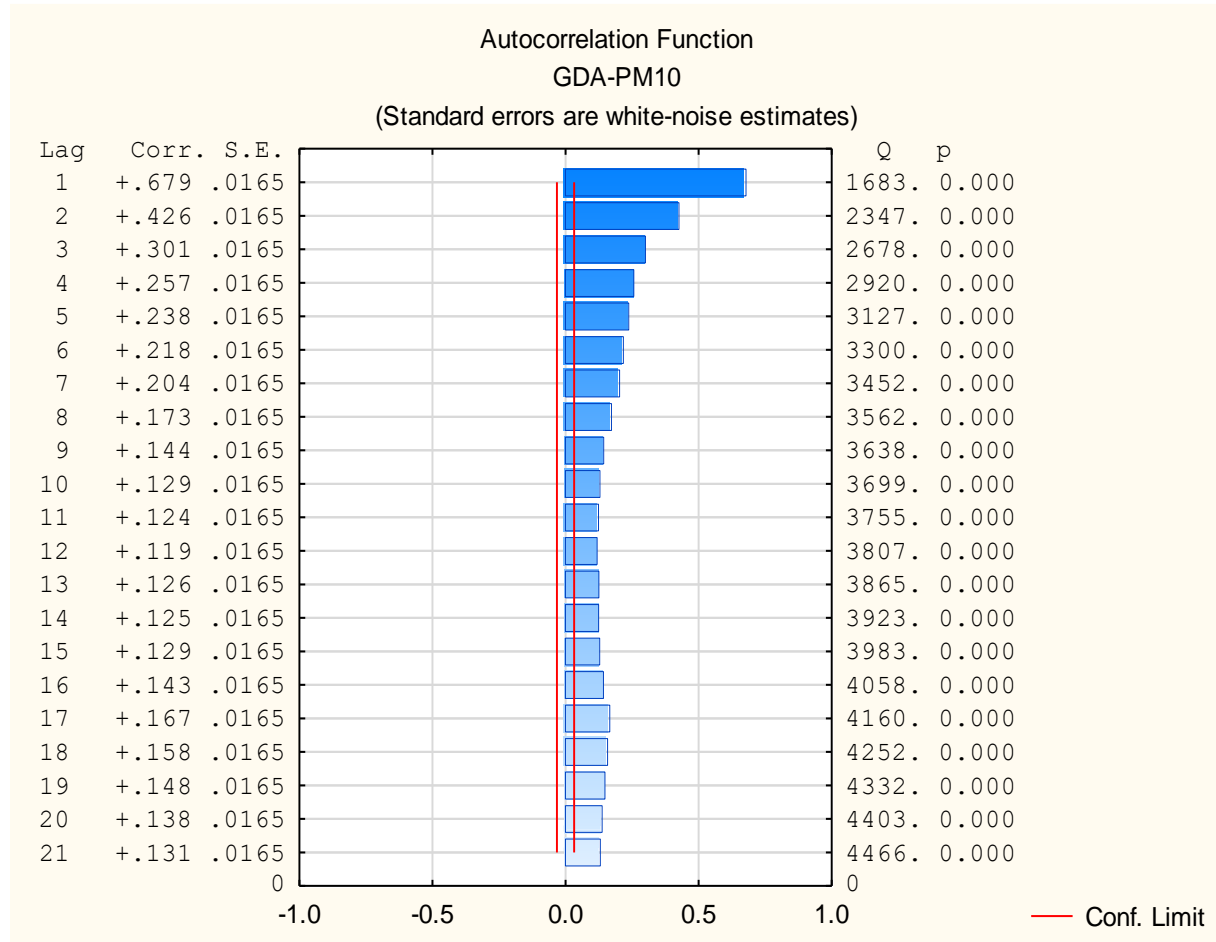

l)

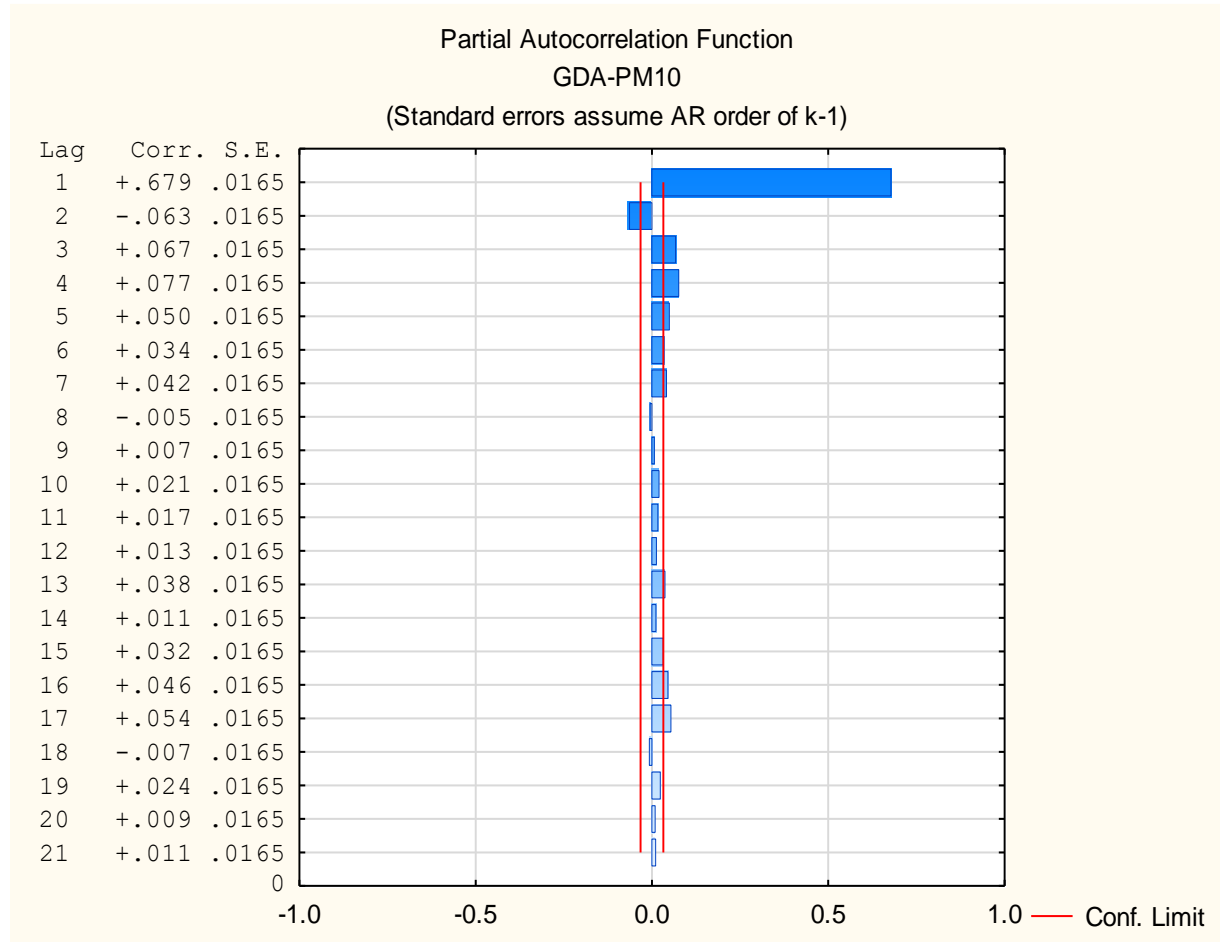

Supplement: s1 [file s1]
