# Supplementary material for: Air Pollutants’ Concentrations Are Associated with Increased Number of RSV Hospitalizations in Polish Children
Source: MDPI journal article supplement (doi:10.3390/jcm10153224), 2021-07-22
Supplement: s1 [file s1]

Supplementary materials 1.

The distribution of the RSV cases: a) annual graph, b) seasonal graph (cool versus warm season), c) quarter graph, d) seasonal and annual graphs combined with corresponding tables (table A- annual, B- seasonal, and C- annual and seasonal). The vertical bars denote 0.95 confidence intervals. The tables show mean and standard error and 95% confidence intervals. Abbreviations for the cities: GDA- Gdansk, WAW- Warsaw, KRA-Krakow, WRO- Wroclaw, LOD- Lodz, SZC- Szczecin, WAL- Walbrzych

a) annual distribution

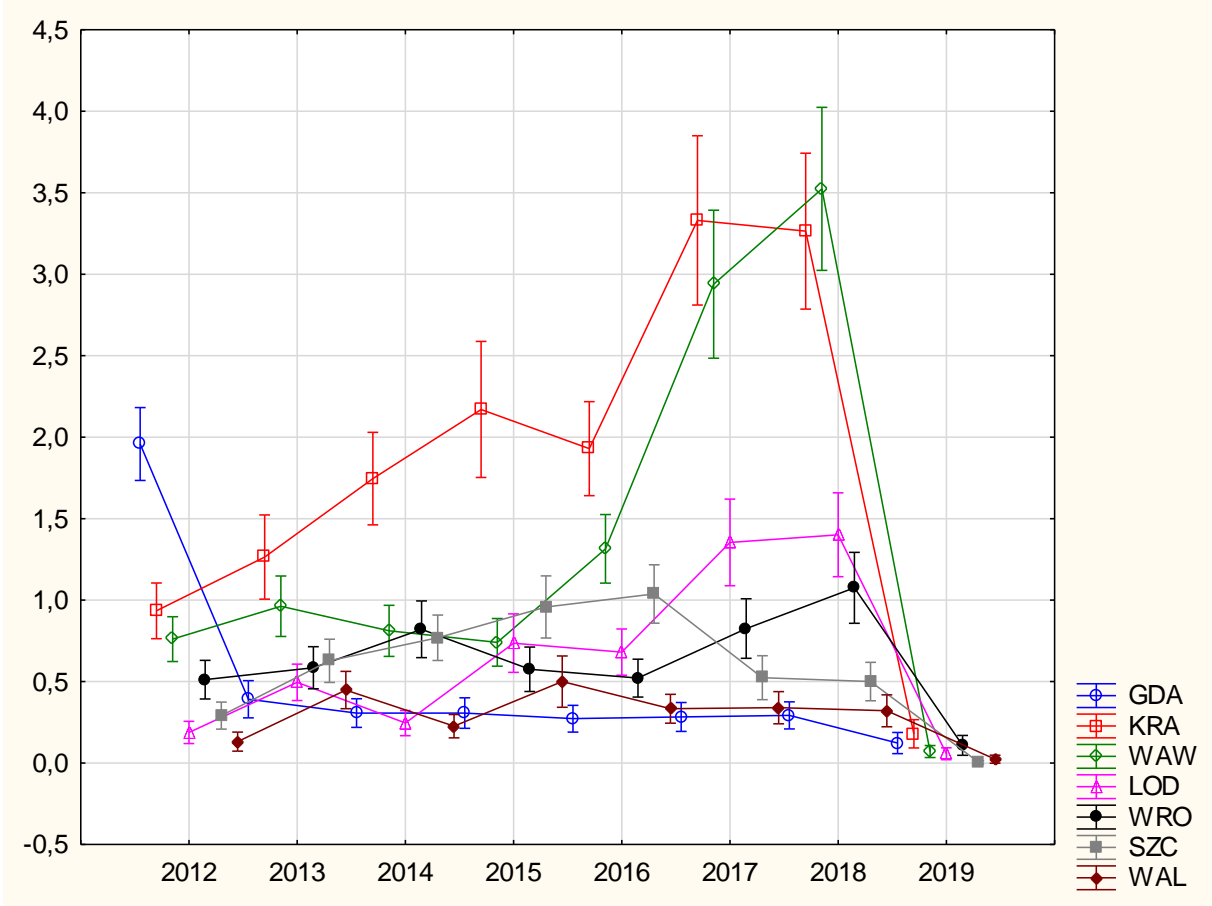

b) seasonal distribution

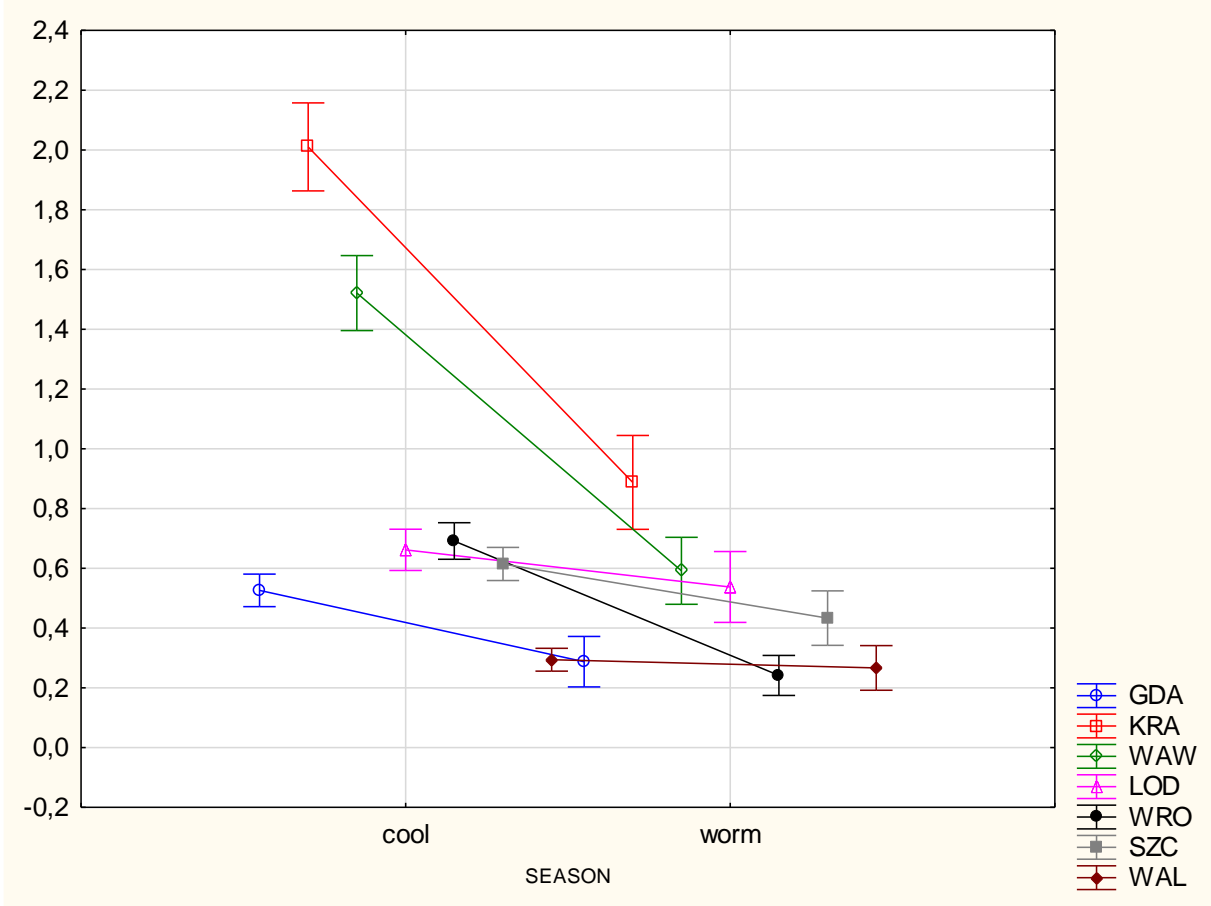

c) quarter distribution

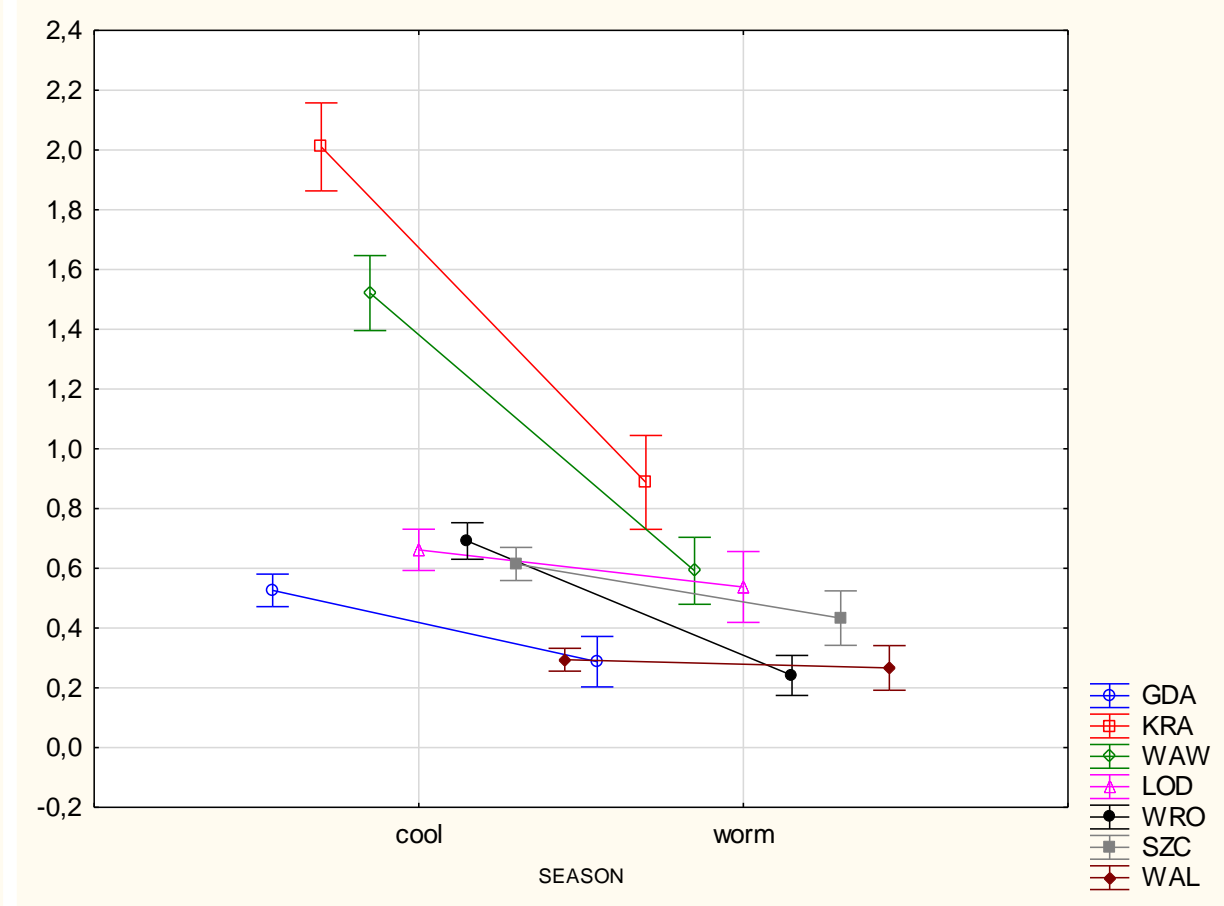

d) seasonal and annual distribution combined

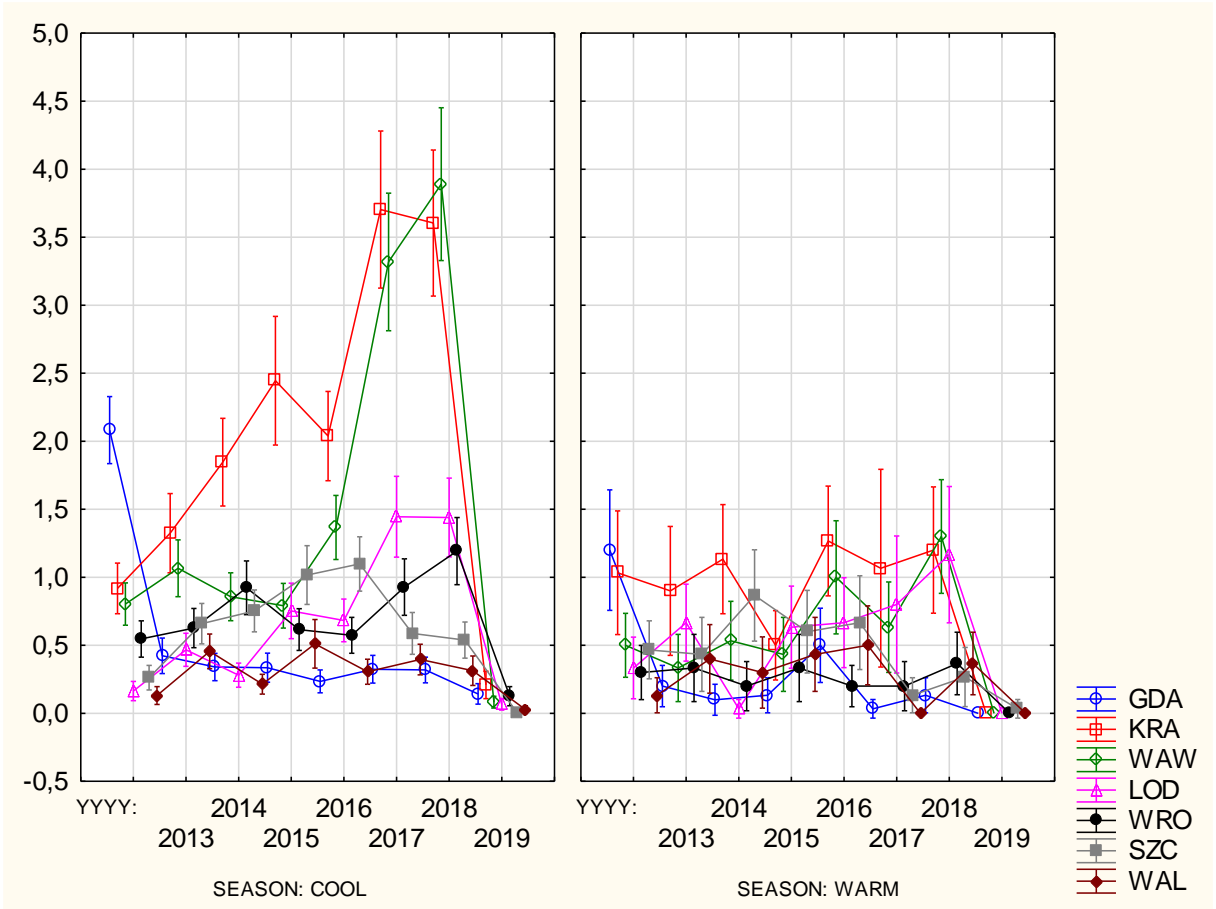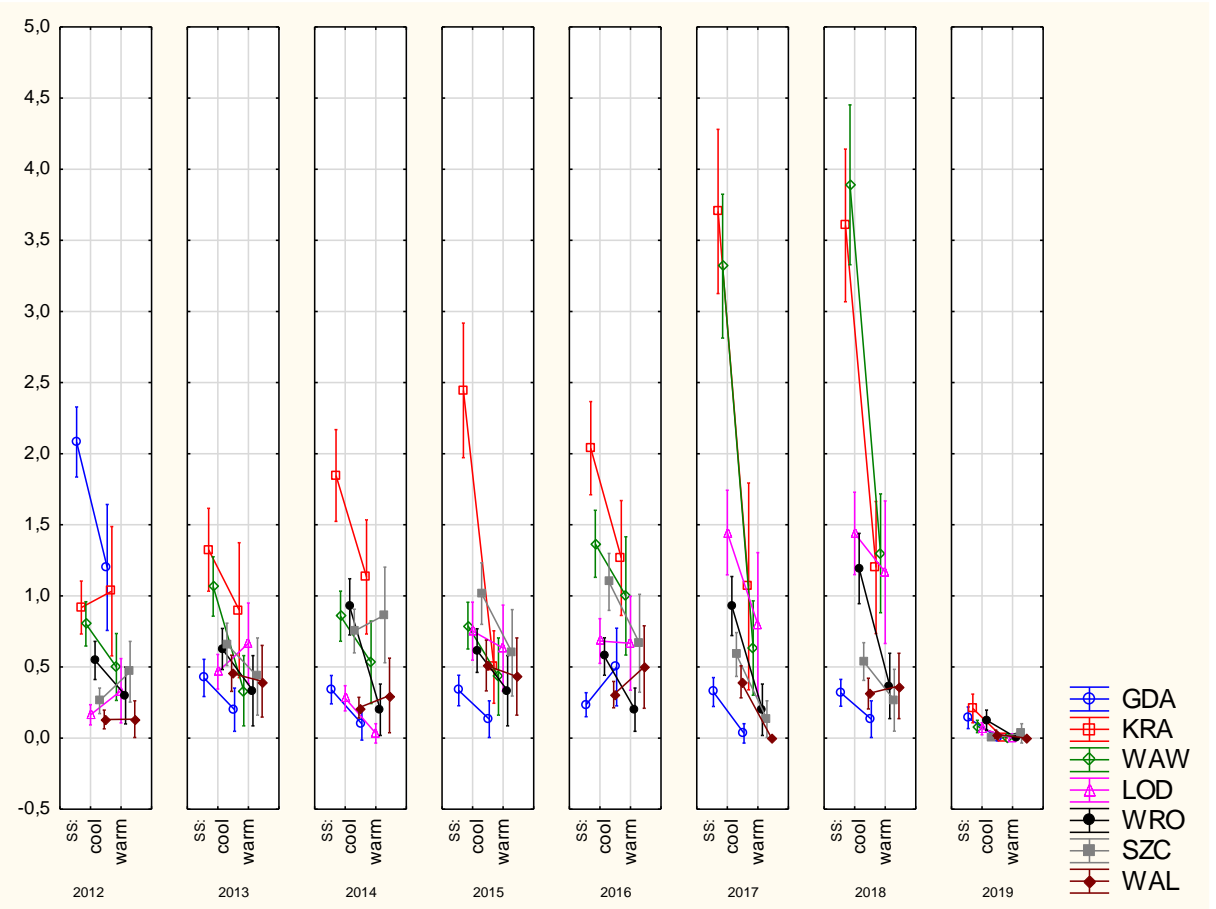

Table A) annual distribution of RSV cases

| YEAR | GDA  |          |       |      | KRA  |          |       |      | WAW  |          |       |      | LOD  |          |       |      | WRO  |          |       |      | SZC  |          |       |      | WAL  |          |       |      |
|------|------|----------|-------|------|------|----------|-------|------|------|----------|-------|------|------|----------|-------|------|------|----------|-------|------|------|----------|-------|------|------|----------|-------|------|
|      | Mean | Std.Err. | -0,95 | 0,95 |
| 2012 | 1,96 | 0,11     | 1,73  | 2,18 | 0,93 | 0,09     | 0,76  | 1,11 | 0,76 | 0,07     | 0,62  | 0,90 | 0,19 | 0,03     | 0,12  | 0,26 | 0,51 | 0,06     | 0,39  | 0,63 | 0,29 | 0,04     | 0,21  | 0,37 | 0,13 | 0,03     | 0,07  | 0,19 |
| 2013 | 0,39 | 0,06     | 0,28  | 0,51 | 1,26 | 0,13     | 1,01  | 1,52 | 0,96 | 0,09     | 0,78  | 1,15 | 0,50 | 0,06     | 0,38  | 0,61 | 0,58 | 0,07     | 0,46  | 0,71 | 0,63 | 0,07     | 0,49  | 0,76 | 0,45 | 0,06     | 0,33  | 0,56 |
| 2014 | 0,31 | 0,04     | 0,22  | 0,39 | 1,75 | 0,14     | 1,46  | 2,03 | 0,81 | 0,08     | 0,65  | 0,97 | 0,25 | 0,04     | 0,17  | 0,32 | 0,82 | 0,09     | 0,65  | 0,99 | 0,77 | 0,07     | 0,63  | 0,91 | 0,23 | 0,04     | 0,15  | 0,30 |
| 2015 | 0,31 | 0,05     | 0,21  | 0,40 | 2,17 | 0,21     | 1,75  | 2,59 | 0,74 | 0,07     | 0,59  | 0,89 | 0,74 | 0,09     | 0,56  | 0,92 | 0,58 | 0,07     | 0,44  | 0,71 | 0,96 | 0,10     | 0,77  | 1,15 | 0,50 | 0,08     | 0,34  | 0,66 |
| 2016 | 0,27 | 0,04     | 0,19  | 0,35 | 1,93 | 0,15     | 1,64  | 2,22 | 1,31 | 0,11     | 1,10  | 1,52 | 0,68 | 0,07     | 0,54  | 0,82 | 0,52 | 0,06     | 0,40  | 0,64 | 1,04 | 0,09     | 0,86  | 1,22 | 0,33 | 0,04     | 0,24  | 0,42 |
| 2017 | 0,28 | 0,05     | 0,19  | 0,37 | 3,33 | 0,26     | 2,81  | 3,85 | 2,94 | 0,23     | 2,48  | 3,39 | 1,35 | 0,13     | 1,09  | 1,62 | 0,83 | 0,09     | 0,64  | 1,01 | 0,52 | 0,07     | 0,39  | 0,66 | 0,34 | 0,05     | 0,24  | 0,44 |
| 2018 | 0,29 | 0,04     | 0,21  | 0,38 | 3,26 | 0,24     | 2,79  | 3,74 | 3,52 | 0,25     | 3,02  | 4,02 | 1,40 | 0,13     | 1,14  | 1,66 | 1,08 | 0,11     | 0,86  | 1,29 | 0,50 | 0,06     | 0,38  | 0,62 | 0,32 | 0,05     | 0,22  | 0,42 |
| 2019 | 0,12 | 0,03     | 0,06  | 0,19 | 0,18 | 0,04     | 0,09  | 0,27 | 0,07 | 0,02     | 0,03  | 0,11 | 0,06 | 0,02     | 0,02  | 0,09 | 0,11 | 0,03     | 0,05  | 0,17 | 0,00 | 0,00     | 0,00  | 0,01 | 0,02 | 0,01     | 0,00  | 0,05 |

Table B) seasonal distribution of RSV cases

| SEASON | GDA  |          |         |        | KRA  |          |         |        | WAW  |          |         |        | LOD  |          |         |        | WRO  |          |         |        | SZC  |          |         |        | WAL  |          |         |        |
|--------|------|----------|---------|--------|------|----------|---------|--------|------|----------|---------|--------|------|----------|---------|--------|------|----------|---------|--------|------|----------|---------|--------|------|----------|---------|--------|
|        | Mean | Std.Err. | -95,00% | 95,00% |
| cool   | 0,53 | 0,03     | 0,47    | 0,58   | 2,01 | 0,08     | 1,86    | 2,16   | 1,52 | 0,06     | 1,40    | 1,65   | 0,66 | 0,04     | 0,59    | 0,73   | 0,69 | 0,03     | 0,63    | 0,75   | 0,61 | 0,03     | 0,56    | 0,67   | 0,29 | 0,02     | 0,26    | 0,33   |
| warm   | 0,29 | 0,04     | 0,20    | 0,37   | 0,89 | 0,08     | 0,73    | 1,04   | 0,59 | 0,06     | 0,48    | 0,70   | 0,54 | 0,06     | 0,42    | 0,66   | 0,24 | 0,03     | 0,17    | 0,31   | 0,43 | 0,05     | 0,34    | 0,52   | 0,27 | 0,04     | 0,19    | 0,34   |

Table C) annual and seasonal distribution of RSV cases

| YEAR | SEASON | GDA  |          |       |      | KRA  |          |       |      | WAW  |          |       |      | LOD  |          |       |      | WRO  |          |       |      | SZC  |          |       |      | WAL  |          |       |      |
|------|--------|------|----------|-------|------|------|----------|-------|------|------|----------|-------|------|------|----------|-------|------|------|----------|-------|------|------|----------|-------|------|------|----------|-------|------|
|      |        | Mean | Std.Err. | -0,95 | 0,95 |
| 2012 | cool   | 2,08 | 0,12     | 1,84  | 2,33 | 0,92 | 0,09     | 0,73  | 1,10 | 0,80 | 0,08     | 0,65  | 0,96 | 0,16 | 0,04     | 0,09  | 0,23 | 0,55 | 0,07     | 0,41  | 0,68 | 0,26 | 0,05     | 0,17  | 0,35 | 0,13 | 0,03     | 0,07  | 0,20 |
| 2012 | warm   | 1,20 | 0,22     | 0,76  | 1,64 | 1,03 | 0,22     | 0,58  | 1,49 | 0,50 | 0,11     | 0,26  | 0,74 | 0,33 | 0,11     | 0,11  | 0,56 | 0,30 | 0,10     | 0,10  | 0,50 | 0,47 | 0,10     | 0,25  | 0,68 | 0,13 | 0,06     | 0,00  | 0,26 |
| 2013 | cool   | 0,42 | 0,07     | 0,29  | 0,55 | 1,32 | 0,15     | 1,03  | 1,62 | 1,07 | 0,11     | 0,86  | 1,27 | 0,47 | 0,06     | 0,35  | 0,59 | 0,63 | 0,07     | 0,48  | 0,77 | 0,66 | 0,08     | 0,51  | 0,81 | 0,46 | 0,06     | 0,33  | 0,58 |
| 2013 | warm   | 0,20 | 0,07     | 0,05  | 0,35 | 0,90 | 0,23     | 0,43  | 1,37 | 0,33 | 0,12     | 0,09  | 0,58 | 0,67 | 0,14     | 0,38  | 0,95 | 0,33 | 0,12     | 0,09  | 0,58 | 0,43 | 0,13     | 0,16  | 0,71 | 0,40 | 0,12     | 0,15  | 0,65 |
| 2014 | cool   | 0,34 | 0,05     | 0,24  | 0,44 | 1,85 | 0,16     | 1,52  | 2,17 | 0,86 | 0,09     | 0,68  | 1,03 | 0,28 | 0,05     | 0,19  | 0,37 | 0,92 | 0,10     | 0,73  | 1,12 | 0,75 | 0,08     | 0,60  | 0,91 | 0,21 | 0,04     | 0,14  | 0,29 |
| 2014 | warm   | 0,10 | 0,06     | -0,01 | 0,21 | 1,13 | 0,20     | 0,73  | 1,53 | 0,53 | 0,14     | 0,24  | 0,82 | 0,03 | 0,03     | -0,03 | 0,10 | 0,20 | 0,09     | 0,02  | 0,38 | 0,87 | 0,16     | 0,53  | 1,20 | 0,30 | 0,13     | 0,04  | 0,56 |
| 2015 | cool   | 0,34 | 0,05     | 0,23  | 0,44 | 2,45 | 0,24     | 1,97  | 2,92 | 0,79 | 0,08     | 0,63  | 0,96 | 0,75 | 0,10     | 0,55  | 0,96 | 0,62 | 0,08     | 0,46  | 0,77 | 1,02 | 0,11     | 0,80  | 1,23 | 0,51 | 0,09     | 0,33  | 0,69 |
| 2015 | warm   | 0,13 | 0,06     | 0,00  | 0,26 | 0,50 | 0,12     | 0,25  | 0,75 | 0,43 | 0,13     | 0,16  | 0,71 | 0,63 | 0,15     | 0,33  | 0,94 | 0,33 | 0,12     | 0,09  | 0,58 | 0,60 | 0,15     | 0,30  | 0,90 | 0,43 | 0,13     | 0,16  | 0,71 |
| 2016 | cool   | 0,23 | 0,04     | 0,15  | 0,32 | 2,04 | 0,17     | 1,71  | 2,37 | 1,37 | 0,12     | 1,13  | 1,60 | 0,68 | 0,08     | 0,53  | 0,84 | 0,57 | 0,07     | 0,44  | 0,71 | 1,10 | 0,10     | 0,90  | 1,30 | 0,31 | 0,05     | 0,21  | 0,40 |
| 2016 | warm   | 0,50 | 0,13     | 0,23  | 0,77 | 1,27 | 0,20     | 0,86  | 1,67 | 1,00 | 0,20     | 0,58  | 1,42 | 0,67 | 0,16     | 0,34  | 1,00 | 0,20 | 0,07     | 0,05  | 0,35 | 0,67 | 0,17     | 0,32  | 1,01 | 0,50 | 0,14     | 0,21  | 0,79 |
| 2017 | cool   | 0,32 | 0,05     | 0,22  | 0,43 | 3,70 | 0,29     | 3,13  | 4,28 | 3,32 | 0,26     | 2,81  | 3,82 | 1,45 | 0,15     | 1,15  | 1,74 | 0,93 | 0,11     | 0,72  | 1,14 | 0,59 | 0,08     | 0,43  | 0,74 | 0,40 | 0,06     | 0,28  | 0,51 |
| 2017 | warm   | 0,03 | 0,03     | -0,03 | 0,10 | 1,07 | 0,36     | 0,34  | 1,79 | 0,63 | 0,16     | 0,30  | 0,97 | 0,80 | 0,25     | 0,30  | 1,30 | 0,20 | 0,09     | 0,02  | 0,38 | 0,13 | 0,06     | 0,00  | 0,26 | 0,00 |          |       |      |
| 2018 | cool   | 0,32 | 0,05     | 0,22  | 0,41 | 3,60 | 0,27     | 3,07  | 4,14 | 3,89 | 0,28     | 3,33  | 4,45 | 1,44 | 0,15     | 1,15  | 1,73 | 1,19 | 0,13     | 0,95  | 1,44 | 0,54 | 0,07     | 0,41  | 0,67 | 0,31 | 0,05     | 0,20  | 0,42 |
| 2018 | warm   | 0,13 | 0,06     | 0,00  | 0,26 | 1,20 | 0,23     | 0,74  | 1,66 | 1,30 | 0,20     | 0,88  | 1,72 | 1,17 | 0,24     | 0,67  | 1,67 | 0,37 | 0,11     | 0,14  | 0,60 | 0,27 | 0,11     | 0,05  | 0,48 | 0,37 | 0,11     | 0,14  | 0,60 |
| 2019 | cool   | 0,14 | 0,04     | 0,07  | 0,22 | 0,21 | 0,05     | 0,11  | 0,31 | 0,08 | 0,02     | 0,04  | 0,13 | 0,07 | 0,02     | 0,02  | 0,11 | 0,13 | 0,04     | 0,06  | 0,20 | 0,00 |          |       |      | 0,03 | 0,01     | 0,00  | 0,06 |
| 2019 | warm   | 0,00 |          |       |      | 0,00 |          |       |      | 0,00 |          |       |      | 0,00 |          |       |      | 0,00 |          |       |      | 0,03 | 0,03     | -0,03 | 0,10 | 0,00 |          |       |      |
