# Supplementary material for: Air Pollutants’ Concentrations Are Associated with Increased Number of RSV Hospitalizations in Polish Children
Source: MDPI journal article supplement (doi:10.3390/jcm10153224), 2021-07-22
Supplement: s1 [file s1]

Supplementary materials 4. A correlation between the air pollutants' concentrations (statistically significant coefficients are marked in red). Abbreviations for the cities: GDA- Gdansk, WAW- Warsaw, KRA-Krakow, WRO- Wroclaw, LOD- Lodz, SZC- Szczecin, WAL- Walbrzych

| Variable | RSV_GDA | KRA RSV | WAW RSV | LOD RSV | WRO RSV | SZC RSV | WAL RSV |
|----------|---------|---------|---------|---------|---------|---------|---------|
| GDA-NO2  | 0,03    |         |         |         |         |         |         |
| GDA-PM25 | 0,11    |         |         |         |         |         |         |
| GDA-PM10 | 0,05    |         |         |         |         |         |         |
| KRA-NO2  |         | 0,13    |         |         |         |         |         |
| KRA-PM25 |         | 0,16    |         |         |         |         |         |
| KRA-PM10 |         | 0,13    |         |         |         |         |         |
| WAW-NO2  |         |         | 0,06    |         |         |         |         |
| WAW-PM25 |         |         | 0,12    |         |         |         |         |
| WAW-PM10 |         |         | 0,13    |         |         |         |         |
| LOD-NO2  |         |         |         | 0,14    |         |         |         |
| LOD-PM25 |         |         |         | 0,13    |         |         |         |
| LOD-PM10 |         |         |         | 0,12    |         |         |         |
| WRO-NO2  |         |         |         |         | 0,12    |         |         |
| WRO-PM25 |         |         |         |         | 0,17    |         |         |
| WRO-PM10 |         |         |         |         | 0,14    |         |         |
| SZC-NO2  |         |         |         |         |         | 0,15    |         |
| SZC-PM25 |         |         |         |         |         | 0,10    |         |
| SZC-PM10 |         |         |         |         |         | 0,09    |         |
| WAL-NO2  |         |         |         |         |         |         | 0,12    |
| WAL-PM25 |         |         |         |         |         |         | 0,11    |
| WAL-PM10 |         |         |         |         |         |         | 0,11    |
