# Supplementary material for: Air Pollutants’ Concentrations Are Associated with Increased Number of RSV Hospitalizations in Polish Children
Source: MDPI journal article supplement (doi:10.3390/jcm10153224), 2021-07-22

Supplementary materials 5. The Pareto charts of the effects power (based on the F statistics) and corresponding scatterplots of the air pollutants concentrations and the RSV hospitalizations (sequentially:  $PM_{2.5}$ ,  $PM_{10}$ ,  $NO_2$ ) during the RSV high-risk seasons (2012-2019) in selected study sites (the statistical significance is shown on the Pareto chart, air pollutant that were statistically insignificant are not shown in the Pareto chart, but a scatterplot is shown); a) Gdansk, b) Warsaw, c) Krakow, d) Lodz, e) Wroclaw, f) Szczecin, g) Walbrzych

A) Gdansk

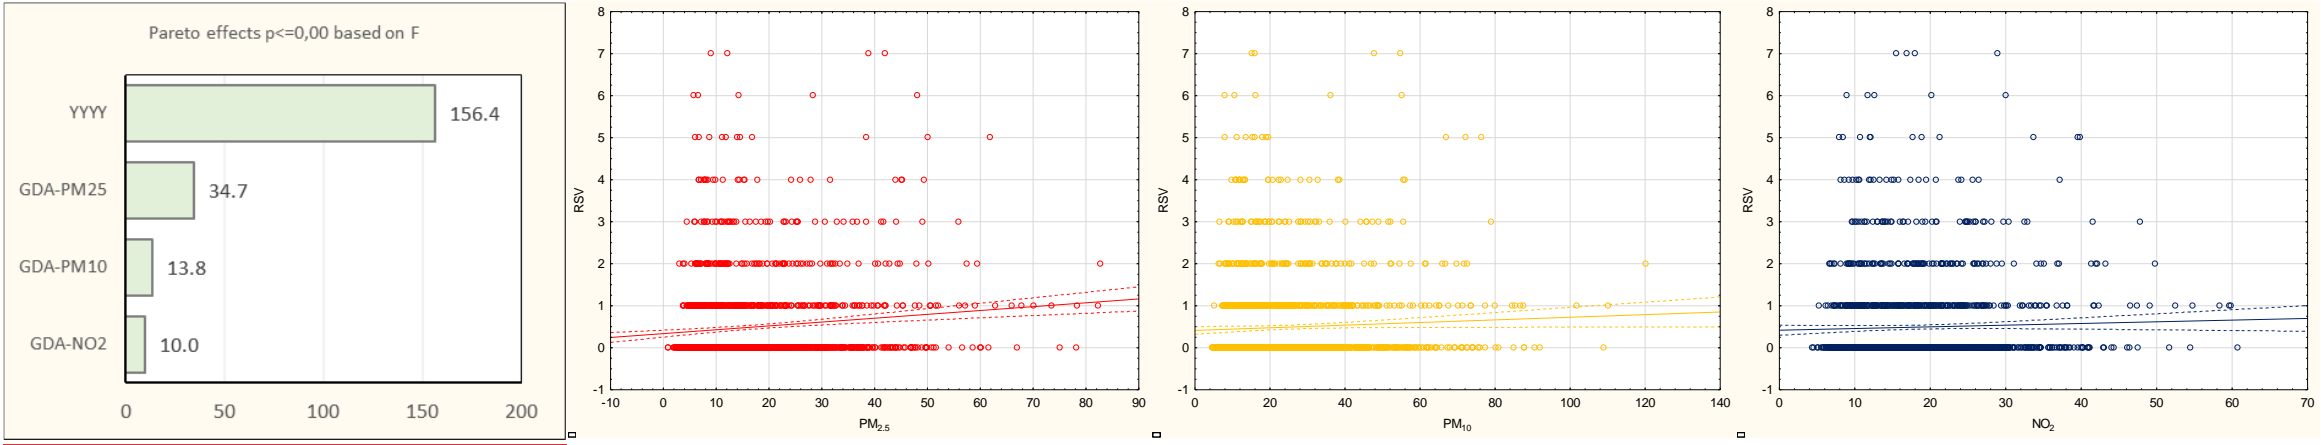

B) Warsaw

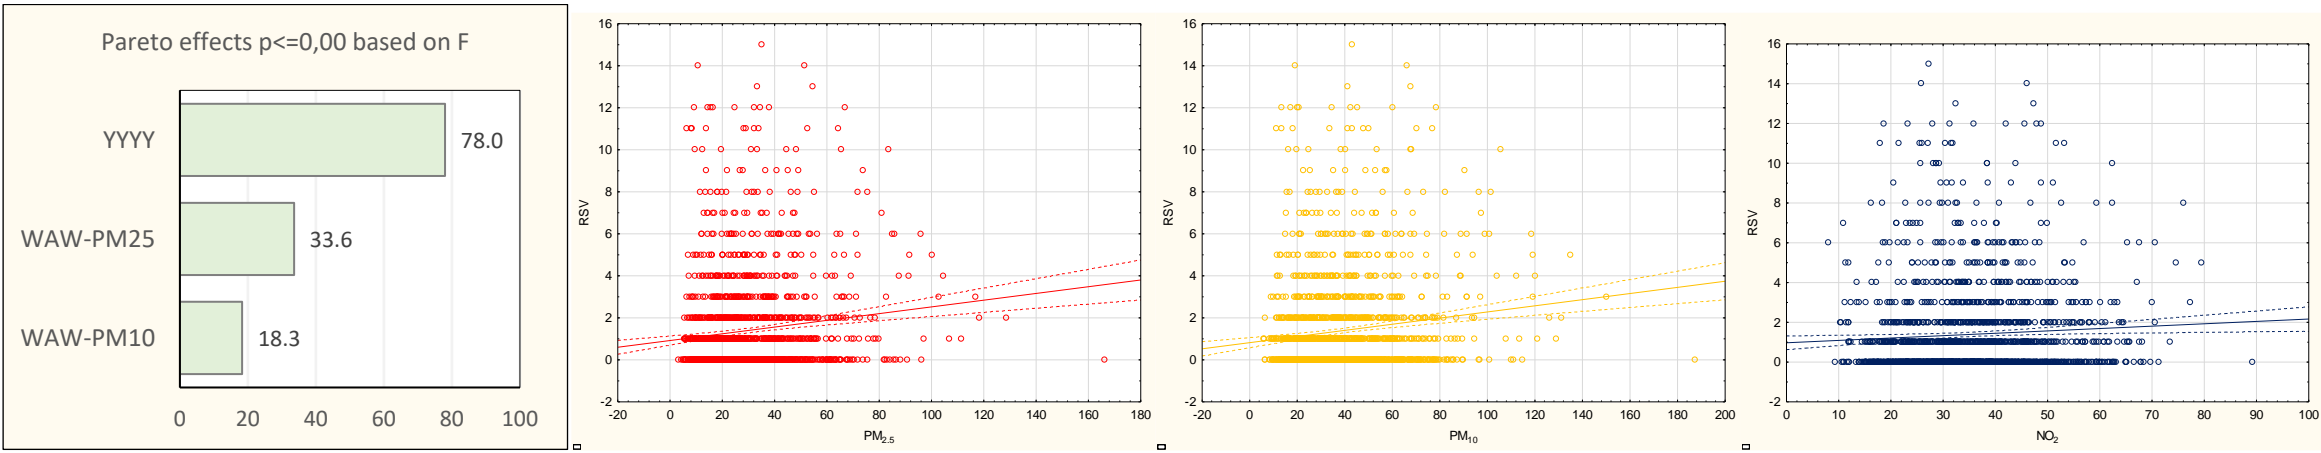

C) Krakow

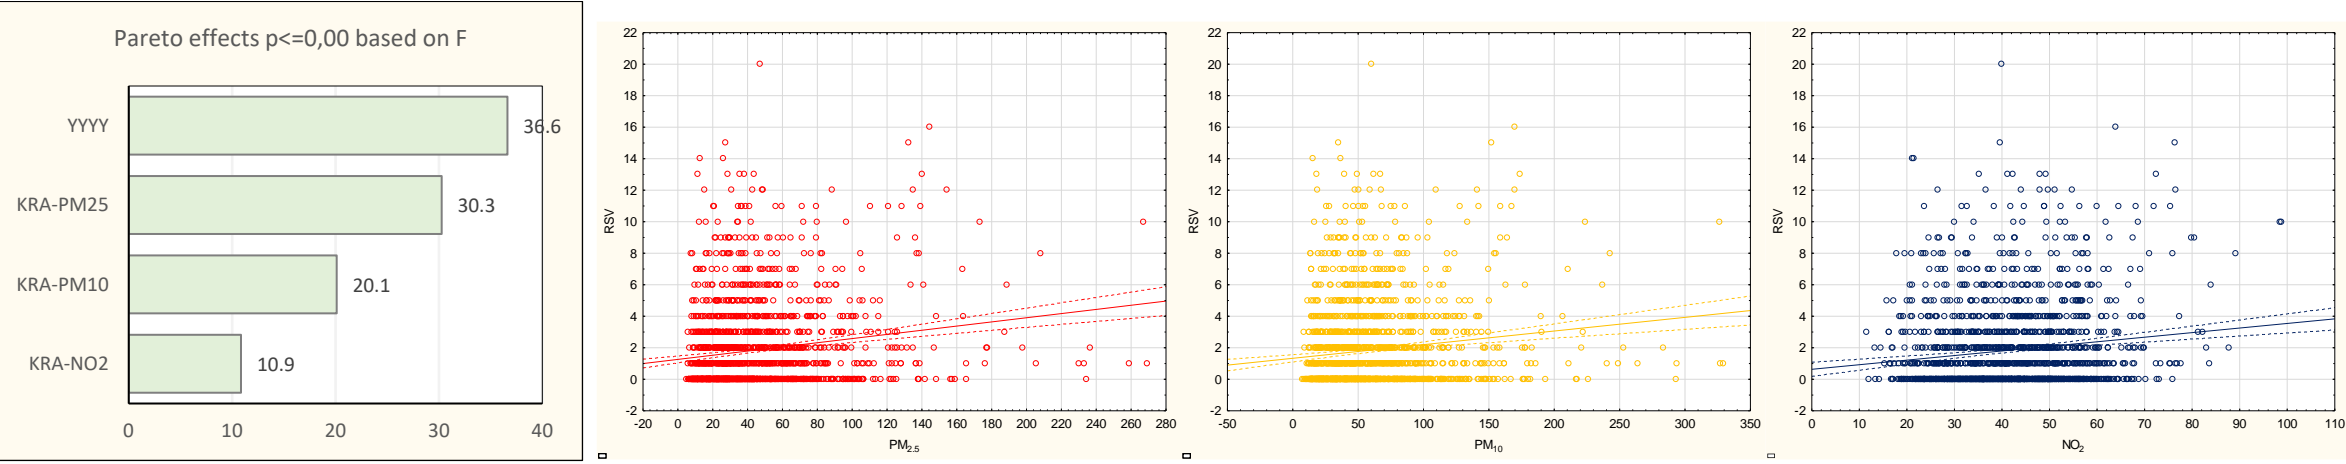

D) Lodz

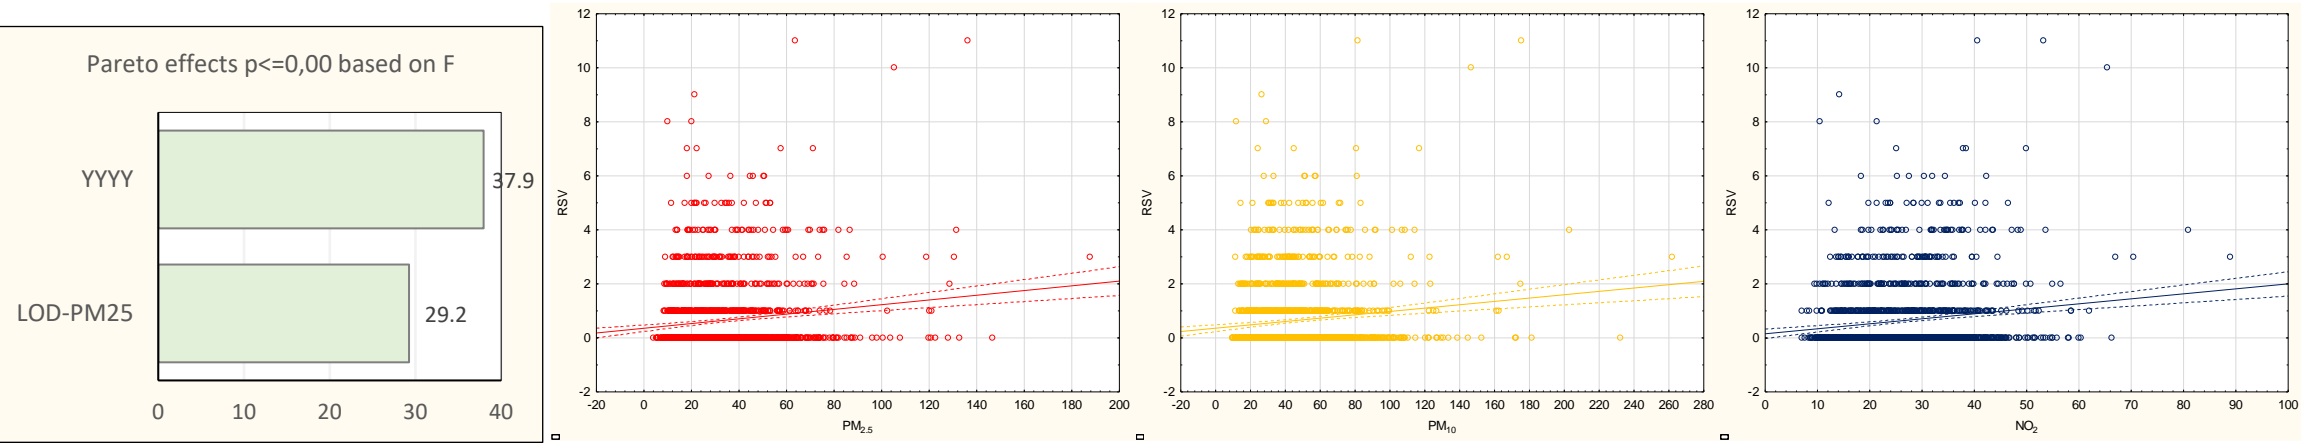

E) Wroclaw

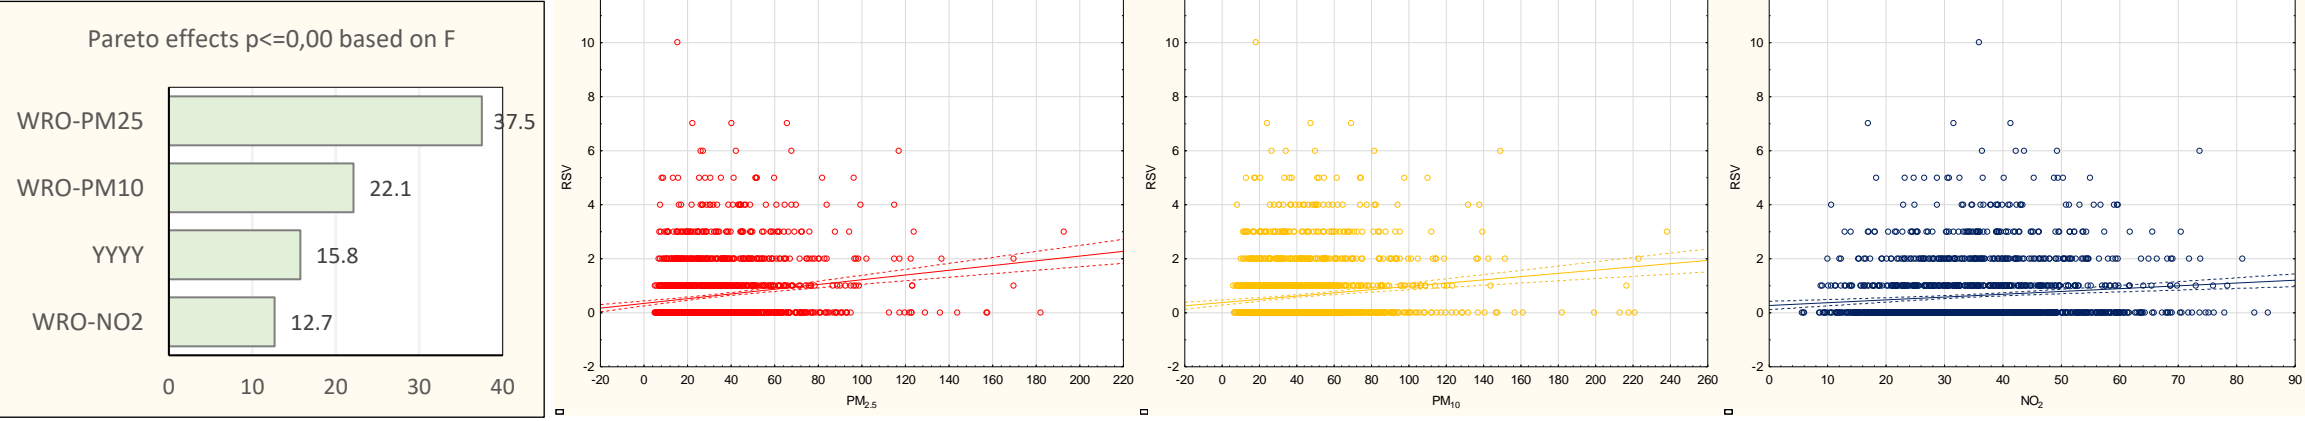

F) Szczecin

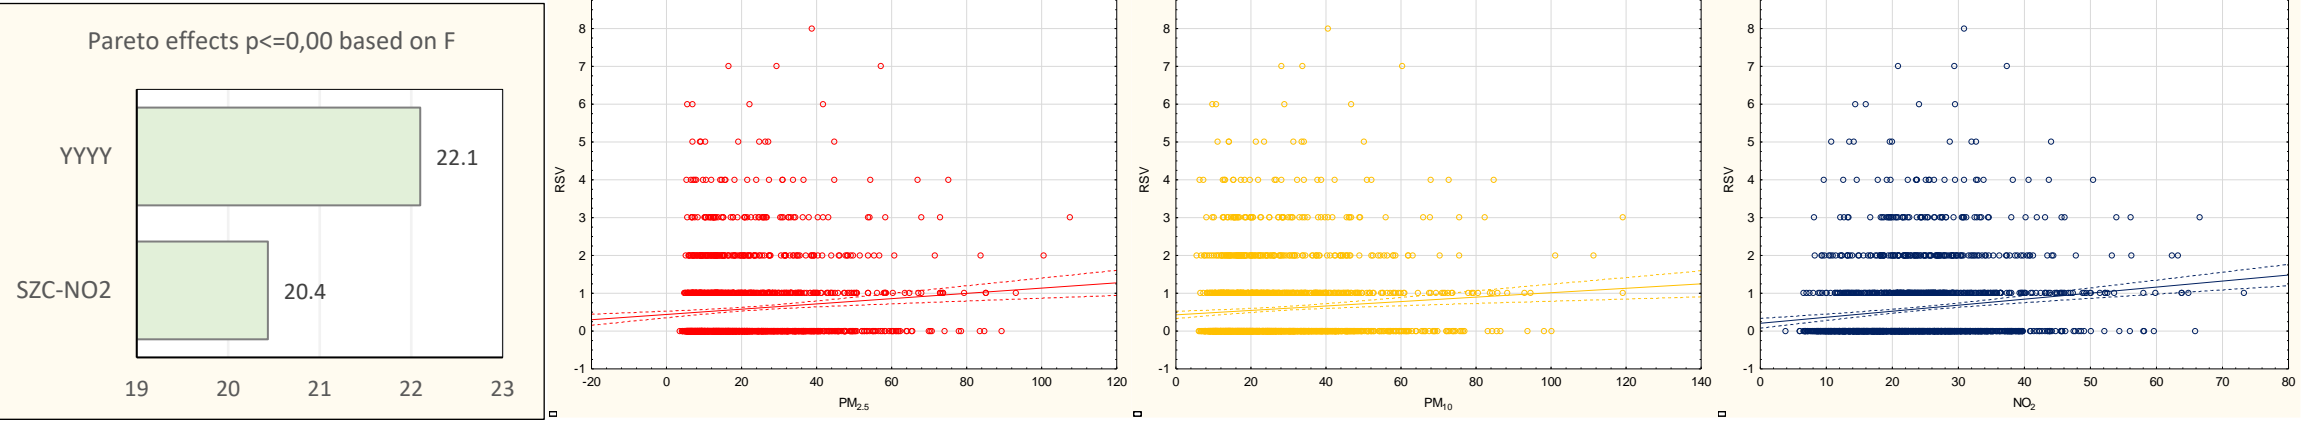

G) Walbrzych

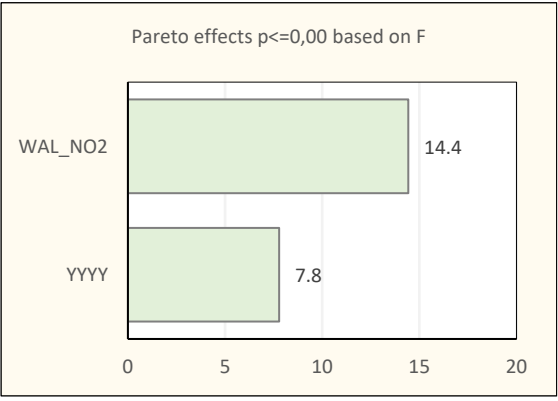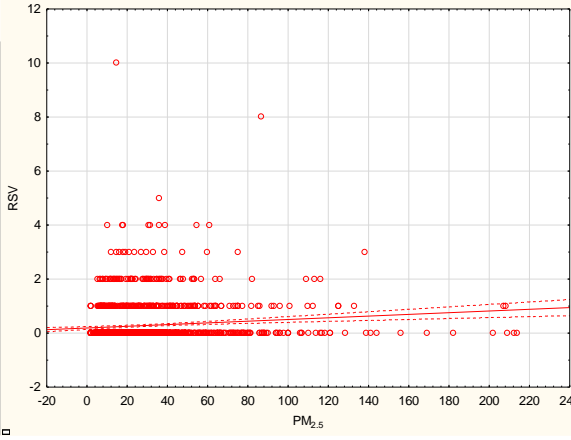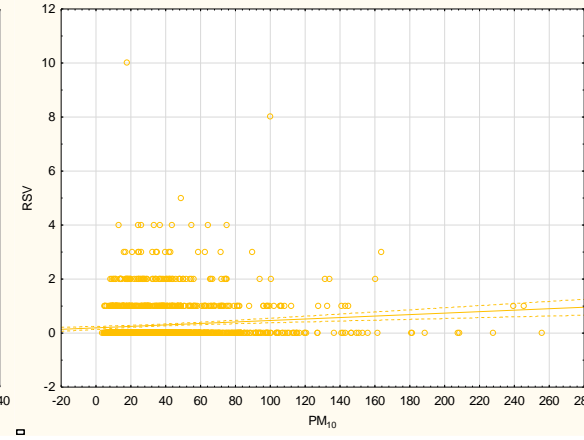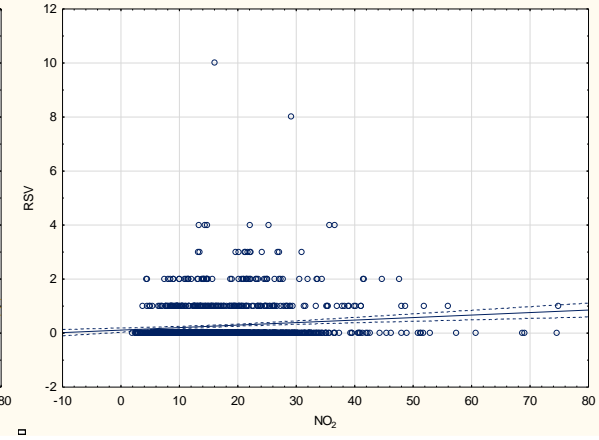

Supplement: s1 [file s1]
